# Supplementary material for: Differentiating ion transport of water-in-salt electrolytes within micro- and meso-pores of a multiporous carbon electrode
Source: Royal Society of Chemistry journal article supplement (doi:10.1039/d4ta03632h), 2024-01-01
Supplement: d4ta03632h1.pdf [file d4ta03632h1.pdf]

## Electronic Supplementary Information

### Differentiating ion transport of water-in-salt electrolytes within micro- and mesopores of a multiporous carbon electrode

M. Tauhidul Islam<sup>1</sup>, Bernhard Gollas<sup>1</sup>, Qamar Abbas<sup>1,2,\*</sup>

*Institute for Chemistry and Technology of Materials, Graz University of Technology,  
Stremayrgasse 9, 8010 Graz, Austria*

*Institute of Chemistry and Technical Electrochemistry, Poznan University of Technology,  
Berdychowo 4, 60965 Poznan, Poland*

\*Corresponding author email: [qamar.abbas@tugraz.at](mailto:qamar.abbas@tugraz.at)

### Table of contents

|                                                                                                                                                                                                                                                                                                                                                         |    |
|---------------------------------------------------------------------------------------------------------------------------------------------------------------------------------------------------------------------------------------------------------------------------------------------------------------------------------------------------------|----|
| <b>Table S1:</b> Salt to water volume ratio, salt to water weight ratio and water to salt molar mass ratio for different concentration of electrolytes prepared from ChCl and LiTFSI. ....                                                                                                                                                              | 4  |
| <b>Figure S1:</b> Salt to water volume ratio, salt to water weight ratio and water to salt molar ratio for a) LiTFSI and b) ChCl. ....                                                                                                                                                                                                                  | 4  |
| <b>Figure S2:</b> Schematic diagram of the Swagelok cell utilized for potentiostatic electrochemical impedance spectroscopy of bulk electrolyte solutions at open circuit voltage (25 °C). ....                                                                                                                                                         | 5  |
| <b>Table S2:</b> Measured viscosity, reported tracer diffusivity from diaphragm cell method by Tanaka et al. <sup>1</sup> and calculated hydrodynamic radii from Stokes-Einstein equation for several aqueous LiCl solutions at 25 °C. ....                                                                                                             | 5  |
| <b>Table S3:</b> Measured viscosity, reported diffusivity from PFG-NMR by Abbas et al. <sup>2</sup> , and calculated hydrodynamic radii from Stokes-Einstein equation for several aqueous choline fluoride solutions at 25 °C. ....                                                                                                                     | 5  |
| <b>Table S4:</b> Experimental molar ionic conductivity ( $\Lambda_{\text{EIS}}$ ) and calculated molar ionic conductivity ( $\Lambda_{\text{NE}}$ ) for ChCl and LiTFSI. ....                                                                                                                                                                           | 6  |
| <b>Method S1:</b> Calculation of transference number. ....                                                                                                                                                                                                                                                                                              | 6  |
| <b>Figure S3:</b> Transference number of ions for different concentration of water-in-ChCl and water-in-LiTFSI. ....                                                                                                                                                                                                                                    | 6  |
| <b>Method S2:</b> Determination of the molecular volume of H <sub>2</sub> O. ....                                                                                                                                                                                                                                                                       | 7  |
| <b>Table S5:</b> Hydration number of choline, chloride, lithium and TFSI ions using their effective hydrated radii ( $R_{\text{H}}$ ) and Stokes radii ( $R_{\text{s}}$ ). ....                                                                                                                                                                         | 7  |
| <b>Figure S4:</b> Raman spectra of DI water, crystalline ChCl and different bulk water-in-ChCl. <b>a)</b> Full spectra over 4000-120 cm <sup>-1</sup> , and enlarged solute bands over <b>b)</b> 600-250 cm <sup>-1</sup> , <b>c)</b> 1000-600 cm <sup>-1</sup> , <b>d)</b> 1700-980 cm <sup>-1</sup> , and <b>e)</b> 3100-2800 cm <sup>-1</sup> . .... | 8  |
| <b>Table S6:</b> Assignment of the Raman bands measured from the bulk water-in-ChCl solutions over 4000-120 cm <sup>-1</sup> . ....                                                                                                                                                                                                                     | 9  |
| <b>Figure S5:</b> Raman spectra of DI water, crystalline LiTFSI and different bulk water-in-LiTFSI over 4000 to 120 cm <sup>-1</sup> . ....                                                                                                                                                                                                             | 10 |

|                                                                                                                                                                                                                                                                                                                                                                                                                                                                                                                                                                   |    |
|-------------------------------------------------------------------------------------------------------------------------------------------------------------------------------------------------------------------------------------------------------------------------------------------------------------------------------------------------------------------------------------------------------------------------------------------------------------------------------------------------------------------------------------------------------------------|----|
| <b>Figure S6:</b> Changes in water band at 1640 cm <sup>-1</sup> for different concentrations of <b>a)</b> ChCl and <b>b)</b> LiTFSI. ....                                                                                                                                                                                                                                                                                                                                                                                                                        | 11 |
| <b>Table S7:</b> Changes of peak intensity, position and width in water band at 1640 cm <sup>-1</sup> for different concentrations of ChCl. ....                                                                                                                                                                                                                                                                                                                                                                                                                  | 12 |
| <b>Figure S7:</b> Evolution of water band at 1640 cm <sup>-1</sup> for different diluted aqueous LiTFSI solutions. ....                                                                                                                                                                                                                                                                                                                                                                                                                                           | 12 |
| <b>Figure S8:</b> Gaussian deconvolution of several water bands at 3220 cm <sup>-1</sup> (P1-FHW), 3430 cm <sup>-1</sup> (P2-PHW1), and 3610 cm <sup>-1</sup> (P3-PHW2) for <b>a)</b> 1 mol·kg <sup>-1</sup> ChCl, <b>b)</b> 5 mol·kg <sup>-1</sup> ChCl, <b>c)</b> 10 mol·kg <sup>-1</sup> ChCl, <b>d)</b> 15 mol·kg <sup>-1</sup> ChCl, <b>e)</b> 20 mol·kg <sup>-1</sup> ChCl, <b>f)</b> crystalline ChCl salt. Cyan dotted curve in each figure is indicating the cumulative fitting (Before deconvolution, baseline was corrected and then normalized). .... | 13 |
| <b>Table S8:</b> Intensity, position and width of water bands at 3220 cm <sup>-1</sup> (P1), 3430 cm <sup>-1</sup> (P2), and 3610 cm <sup>-1</sup> (P3) for different concentrations of ChCl. ....                                                                                                                                                                                                                                                                                                                                                                | 13 |
| <b>Figure S9:</b> Gaussian deconvolution of several water bands at 3220 cm <sup>-1</sup> (P1), 3430 cm <sup>-1</sup> (P2), and 3610 cm <sup>-1</sup> (P3) for <b>a)</b> 1 mol·kg <sup>-1</sup> LiTFSI, <b>b)</b> 5 mol·kg <sup>-1</sup> LiTFSI, <b>c).</b> 10 mol·kg <sup>-1</sup> LiTFSI, <b>d)</b> 15 mol·kg <sup>-1</sup> LiTFSI, <b>e)</b> 20 mol·kg <sup>-1</sup> LiTFSI, <b>f)</b> Crystalline LiTFSI salt. Cyan dotted curve in each figure indicates the cumulative fitting. Before deconvolution, baseline was corrected and then normalized. ....       | 14 |
| <b>Table S9:</b> Intensity, position and width of water bands at 3220 cm <sup>-1</sup> (P1), 3430 cm <sup>-1</sup> (P2), and 3610 cm <sup>-1</sup> (P3) for different concentrations of LiTFSI. ....                                                                                                                                                                                                                                                                                                                                                              | 14 |
| <b>Figure S10:</b> Intensity ratio of the -OH stretching bands at 3200 cm <sup>-1</sup> (I <sub>3220</sub> ) and 3440 cm <sup>-1</sup> (I <sub>3440</sub> ) for ChCl and LiTFSI. Connecting dotted lines are guide to the eye. ....                                                                                                                                                                                                                                                                                                                               | 15 |
| <b>Figure S11:</b> Nyquist plots of the electrochemical impedance spectra of capacitor cells operating under open circuit potential (≈30 mV) for different concentrations of ChCl and LiTFSI <b>a)</b> 1, <b>b)</b> 5, <b>c)</b> 10, <b>d)</b> 15, and <b>e)</b> 20 mol·kg <sup>-1</sup> . ....                                                                                                                                                                                                                                                                   | 16 |
| <b>Table 10:</b> Equivalent series resistance (ESR), charge transfer resistance (CTR), equivalent distribution resistance (EDR), and ion diffusion resistance (IDR) of the capacitor cells operated at open circuit potential (≈30 mV) for different concentrations of ChCl and LiTFSI. ....                                                                                                                                                                                                                                                                      | 17 |
| <b>Method S3:</b> Analysis of capacitance from EIS. ....                                                                                                                                                                                                                                                                                                                                                                                                                                                                                                          | 17 |
| <b>Figure S12:</b> Real capacitance (C') from EIS of capacitor cells operating under open circuit potential for different concentrations of ChCl and LiTFSI <b>a)</b> 1 m, <b>b)</b> 5 m, <b>c)</b> 10 m, <b>d)</b> 15 m, and <b>e)</b> 20 mol·kg <sup>-1</sup> . ....                                                                                                                                                                                                                                                                                            | 18 |
| <b>Figure S13:</b> Imaginary capacitance (C'') from EIS of capacitor cells operating open circuit potential for different concentrations of ChCl and LiTFSI <b>a)</b> 1, <b>b)</b> 5, <b>c)</b> 10, <b>d)</b> 15, and <b>e)</b> 20 mol·kg <sup>-1</sup> . ....                                                                                                                                                                                                                                                                                                    | 19 |
| <b>Figure S14:</b> Bode plots of electrochemical impedance spectra of capacitor cells operating under open circuit potential for different concentrations of ChCl and LiTFSI. ....                                                                                                                                                                                                                                                                                                                                                                                | 20 |
| <b>Figure S15:</b> Real power (P') from EIS of capacitor cells operating under open circuit potential for different concentrations of ChCl and LiTFSI <b>a)</b> 1, <b>b)</b> 5, <b>c)</b> 10, <b>d)</b> 15, and <b>e)</b> 20 mol·kg <sup>-1</sup> . ..                                                                                                                                                                                                                                                                                                            | 21 |

|                                                                                                                                                                                                                                                                                                                                            |    |
|--------------------------------------------------------------------------------------------------------------------------------------------------------------------------------------------------------------------------------------------------------------------------------------------------------------------------------------------|----|
| <b>Table S11:</b> Effect of salt concentration on the bulk electrolyte conductivity, in-pore ionic conductivity, bulk and in-pore ionic resistance, bulk to in-pore conductivity ratio, capacitance, and power density of capacitor cells under open circuit potential .....                                                               | 22 |
| <b>Figure S16:</b> Nitrogen gas adsorption and desorption isotherm of YP80 F carbon electrode at 77 K. ....                                                                                                                                                                                                                                | 22 |
| <b>Method S4:</b> Determination of ion-pair (mutual) diffusivity from self-ion diffusivity <sup>7</sup> .....                                                                                                                                                                                                                              | 23 |
| <b>Table S12:</b> Diffusivity of ions and water in bulk electrolyte, effective in-pore diffusivity of ions and water, tortuosity, $R_{in-pore}$ , $C''_{max}$ within the micro and meso pores together with their cell time-constants and knee frequencies for different salt concentrations under open circuit potential. ....            | 24 |
| <b>Table S13:</b> In-pore diffusivity of the organic electrolytes $PET_4BF_4$ and $TEABF_4$ determined by in-situ NMR and electrochemical techniques. Borchardt et al. followed three methods <sup>8-10</sup> based on EIS to compare their in-situ NMR diffusivity values within micro, meso, and hierarchical pores. <sup>11</sup> ..... | 25 |
| <b>Table S14:</b> Ion-pair size (nm) in ChCl and LiTFSI with corresponding cumulative surface area (CSA) at pore width similar to ion pair size and cumulative surface area (CSA%) for different salt concentrations. ....                                                                                                                 | 26 |
| <b>Figure S17:</b> Nyquist plots of the electrochemical impedance spectra of the capacitor cells operating under different bias voltage for different concentrations of ChCl and LiTFSI <b>a)</b> 1, <b>b)</b> 5, <b>c)</b> 10, <b>d)</b> 15, and <b>e)</b> 20 mol·kg <sup>-1</sup> .....                                                  | 27 |
| <b>Table S15:</b> Equivalent series resistance (ESR), charge transfer resistance (CTR), equivalent distribution resistance (EDR), and ion diffusion resistance (IDR) from the capacitor cells operating under different bias voltage for different concentrations choline chloride and LiTFSI .....                                        | 28 |
| <b>Figure S18:</b> Imaginary capacitance (C'') from EIS of capacitor cells operating under different bias voltages for different concentrations of ChCl and LiTFSI <b>a)</b> 1, <b>b)</b> 5, <b>c)</b> 10, <b>d)</b> 15, and <b>e)</b> 20 mol·kg <sup>-1</sup> .....                                                                       | 29 |
| <b>Figure S19:</b> Real power (P') from EIS of capacitor cells operating under different bias voltages for different concentrations of ChCl and LiTFSI <b>a)</b> 1, <b>b)</b> 5, <b>c)</b> 10, <b>d)</b> 15, and <b>e)</b> 20 mol·kg <sup>-1</sup> .....                                                                                   | 30 |
| <b>Table S16:</b> Effect of salt concentration and applied voltage on the effective in-pore ion diffusivity, tortuosity, $R_{in-pore}$ , $C''_{max}$ in the micro and meso pores together with their cell time-constant values and knee frequencies .....                                                                                  | 31 |
| <b>Table S17:</b> Effect of salt concentration and voltages on the ionic conductivity and resistivity of the bulk water-in-salt electrolyte solutions. ....                                                                                                                                                                                | 32 |
| <b>Figure S20:</b> Equivalent circuit model for capacitor using aqueous LiTFSI electrolyte .....                                                                                                                                                                                                                                           | 33 |
| <b>Figure S21:</b> The experimental and fitted Nyquist plot of capacitor cell assembled with 1, 5, and 20 mol·kg <sup>-1</sup> LiTFSI measured at open circuit potential ( <b>a</b> , <b>c</b> , <b>e</b> ) and 1.2 V ( <b>b</b> , <b>d</b> , <b>f</b> ) .....                                                                             | 34 |
| <b>Table S18:</b> Effect of salt concentration and applied bias potential on different equivalent circuit model elements ( $R1+C2/R2+C3/(R3+W3)+C4/R4+C5$ ) .....                                                                                                                                                                          | 33 |

**Table S1:** Salt to water volume ratio, salt to water weight ratio and water to salt molar mass ratio for different concentration of electrolytes prepared from ChCl and LiTFSI.

| Salt type | Molal concentration (mol·kg <sup>-1</sup> ) | Mass of water (g) | Mass of salt (g) | Volume of water (cm <sup>3</sup> ) (density 1.004 g·cm <sup>-3</sup> at 25 °C) | Volume of salt (cm <sup>3</sup> ) (density 1.1 g/cm <sup>3</sup> at 25 °C) | Salt to water volume ratio | Salt to water weight ratio | Moles of water | Moles of salt | Water to salt molar ratio |
|-----------|---------------------------------------------|-------------------|------------------|--------------------------------------------------------------------------------|----------------------------------------------------------------------------|----------------------------|----------------------------|----------------|---------------|---------------------------|
| ChCl      | 0.1                                         | 10                | 0.139            | 9.96                                                                           | 0.13                                                                       | 0.01                       | 0.01                       | 0.56           | 0.001         | 557.57                    |
|           | 0.5                                         | 10                | 0.695            | 9.96                                                                           | 0.63                                                                       | 0.06                       | 0.07                       | 0.56           | 0.005         | 111.51                    |
|           | 1                                           | 10                | 1.39             | 9.96                                                                           | 1.26                                                                       | 0.13                       | 0.14                       | 0.56           | 0.01          | 55.76                     |
|           | 2                                           | 10                | 2.78             | 9.96                                                                           | 2.53                                                                       | 0.25                       | 0.28                       | 0.56           | 0.02          | 27.88                     |
|           | 5                                           | 10                | 6.95             | 9.96                                                                           | 6.32                                                                       | 0.63                       | 0.70                       | 0.56           | 0.05          | 11.15                     |
|           | 10                                          | 10                | 13.9             | 9.96                                                                           | 12.64                                                                      | 1.27                       | 1.39                       | 0.56           | 0.10          | 5.58                      |
|           | 15                                          | 10                | 20.85            | 9.96                                                                           | 18.95                                                                      | 1.90                       | 2.09                       | 0.56           | 0.15          | 3.72                      |
|           | 20                                          | 10                | 27.8             | 9.96                                                                           | 25.27                                                                      | 2.54                       | 2.78                       | 0.56           | 0.20          | 2.79                      |
|           | 25                                          | 10                | 34.75            | 9.96                                                                           | 31.59                                                                      | 3.17                       | 3.48                       | 0.56           | 0.25          | 2.23                      |
| LiTFSI    | 0.1                                         | 10                | 0.287            | 9.96                                                                           | 0.22                                                                       | 0.02                       | 0.03                       | 0.56           | 0.001         | 555.29                    |
|           | 0.5                                         | 10                | 1.44             | 9.96                                                                           | 1.08                                                                       | 0.11                       | 0.14                       | 0.56           | 0.005         | 110.67                    |
|           | 1                                           | 10                | 2.87             | 9.96                                                                           | 2.16                                                                       | 0.22                       | 0.29                       | 0.56           | 0.01          | 55.53                     |
|           | 2                                           | 10                | 5.74             | 9.96                                                                           | 4.32                                                                       | 0.43                       | 0.57                       | 0.56           | 0.02          | 27.76                     |
|           | 5                                           | 10                | 14.35            | 9.96                                                                           | 10.79                                                                      | 1.08                       | 1.44                       | 0.56           | 0.05          | 11.10                     |
|           | 10                                          | 10                | 28.71            | 9.96                                                                           | 21.59                                                                      | 2.17                       | 2.87                       | 0.56           | 0.10          | 5.55                      |
|           | 15                                          | 10                | 43.07            | 9.96                                                                           | 32.38                                                                      | 3.25                       | 4.31                       | 0.56           | 0.15          | 3.70                      |
|           | 20                                          | 10                | 57.42            | 9.96                                                                           | 43.17                                                                      | 4.33                       | 5.74                       | 0.56           | 0.20          | 2.78                      |

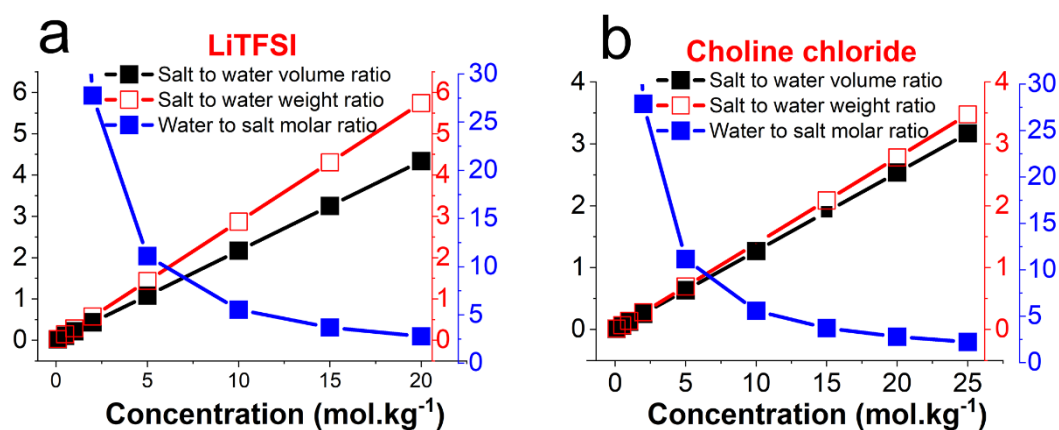

**Figure S1:** Salt to water volume ratio, salt to water weight ratio and water to salt molar ratio for a) LiTFSI and b) ChCl.

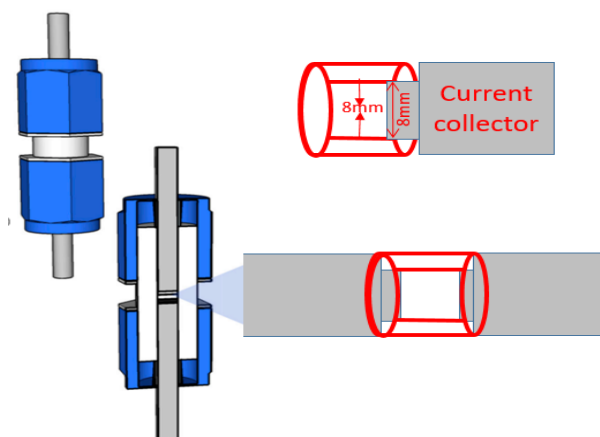

**Figure S2:** Schematic diagram of the Swagelok cell utilized for potentiostatic electrochemical impedance spectroscopy of bulk electrolyte solutions at open circuit voltage (25 °C).

**Table S2:** Measured viscosity, reported tracer diffusivity from diaphragm cell method by Tanaka et al.<sup>1</sup> and calculated hydrodynamic radii from Stokes-Einstein equation for several aqueous LiCl solutions at 25 °C.

| Conc. of LiCl<br>(mol·kg <sup>-1</sup> ) | Viscosity of<br>LiCl (mPa·s) | Ion diffusion coefficient<br>(m <sup>2</sup> ·s <sup>-1</sup> ) |                 | Hydrodynamic radius (m) |                 |
|------------------------------------------|------------------------------|-----------------------------------------------------------------|-----------------|-------------------------|-----------------|
|                                          |                              | Li <sup>+</sup>                                                 | Cl <sup>-</sup> | Li <sup>+</sup>         | Cl <sup>-</sup> |
| 0.1                                      | 1.042                        | 1.02E-09                                                        | 1.88E-09        | 2.05E-10                | 1.11E-10        |
| 0.5                                      | 1.110                        | 1.01E-09                                                        | 1.76E-09        | 1.96E-10                | 1.12E-10        |
| 1.03                                     | 1.199                        | 9.31E-10                                                        | 1.64E-09        | 1.95E-10                | 1.11E-10        |
| 2.1                                      | 1.394                        | 9.14E-10                                                        | 1.49E-09        | 1.71E-10                | 1.05E-10        |
| 5.6                                      | 2.032                        | 6.15E-10                                                        | 1.05E-09        | 1.75E-10                | 1.02E-10        |
| 10                                       | 4.091                        | 4.00E-10                                                        | 6.00E-10        | 1.33E-10                | 8.89E-11        |
| 13.8                                     | 8.897                        | 2.32E-10                                                        | 3.21E-10        | 1.06E-10                | 7.64E-11        |
| 18.6                                     | 18.14                        | 1.41E-10                                                        | 1.43E-10        | 8.53E-11                | 8.41E-11        |

**Table S3:** Measured viscosity, reported diffusivity from PFG-NMR by Abbas et al.<sup>2</sup>, and calculated hydrodynamic radii from Stokes-Einstein equation for several aqueous choline fluoride solutions at 25 °C

| Conc. of ChF<br>(mol·kg <sup>-1</sup> ) | Viscosity of<br>ChF (mPa·s) | Ion diffusion coefficient<br>(m <sup>2</sup> ·s <sup>-1</sup> ) |                | Hydrodynamic radius (m) |                |
|-----------------------------------------|-----------------------------|-----------------------------------------------------------------|----------------|-------------------------|----------------|
|                                         |                             | Ch <sup>+</sup>                                                 | F <sup>-</sup> | Ch <sup>+</sup>         | F <sup>-</sup> |
| 1                                       | 1.328                       | 8.80E-10                                                        | 9.00E-10       | 1.87E-10                | 1.83E-10       |
| 5                                       | 2.837                       | 4.80E-10                                                        | 5.00E-10       | 1.60E-10                | 1.54E-10       |
| 10                                      | 6.174                       | 2.50E-10                                                        | 2.80E-10       | 1.41E-10                | 1.26E-10       |
| 15                                      | 8.255                       | 8.00E-11                                                        | 7.80E-11       | 3.30E-10                | 3.39E-10       |
| 20                                      | 12.05                       | 5.00E-11                                                        | 4.95E-11       | 3.62E-10                | 3.66E-10       |
| 25                                      | 17.67                       | 2.00E-11                                                        | 2.10E-11       | 6.17E-10                | 5.88E-10       |

**Table S4:** Experimental molar ionic conductivity ( $\Lambda_{\text{EIS}}$ ) and calculated molar ionic conductivity ( $\Lambda_{\text{NE}}$ ) for ChCl and LiTFSI

| Concentration<br>(mol·kg <sup>-1</sup> ) | Choline chloride (mS·cm <sup>2</sup> ·mol <sup>-1</sup> ) |                       | LiTFSI (mS·cm <sup>2</sup> ·mol <sup>-1</sup> ) |                       |
|------------------------------------------|-----------------------------------------------------------|-----------------------|-------------------------------------------------|-----------------------|
|                                          | $\Lambda_{\text{EIS}}$                                    | $\Lambda_{\text{NE}}$ | $\Lambda_{\text{EIS}}$                          | $\Lambda_{\text{NE}}$ |
| 1                                        | 52.91                                                     | 43.64                 | 30.84                                           | 54.24                 |
| 5                                        | 20.10                                                     | 20.24                 | 9.85                                            | 30.62                 |
| 10                                       | 7.34                                                      | 8.98                  | 3.59                                            | 12.12                 |
| 15                                       | 3.26                                                      | 3.89                  | 1.16                                            | 6.75                  |
| 20                                       | 1.92                                                      | 2.25                  | 0.53                                            | 3.23                  |

**Method S1:** Calculation of transference number

The cation and anion transference numbers can be calculated from the ionic mobilities or diffusion coefficients of cations and anions using below the relationships.<sup>2,3</sup>

$$t^+ = \frac{D_+}{D_+ + D_-} = \frac{\mu_+}{\mu_+ + \mu_-}$$

$$t^- = \frac{D_-}{D_+ + D_-} = \frac{\mu_-}{\mu_+ + \mu_-}$$

Here,  $D_+$  and  $\mu_+$  are the diffusivity and ionic mobility of cations and  $D_-$  and  $\mu_-$  are the diffusivity and ionic mobility of anions, respectively.

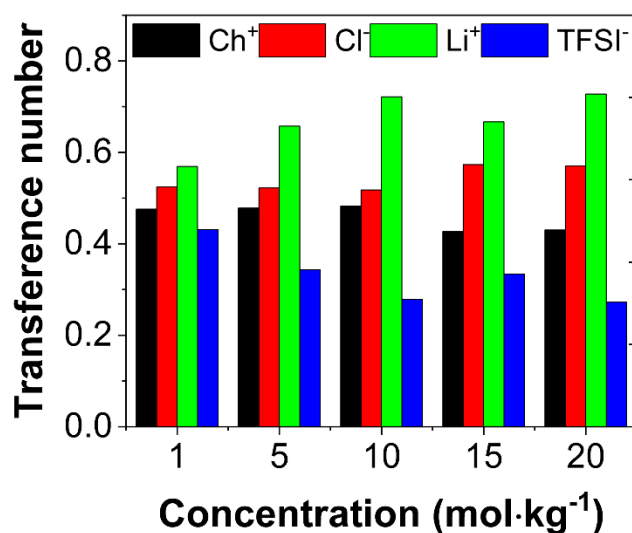

**Figure S3:** Transference number of ions for different concentration of water-in-ChCl and water-in-LiTFSI

**Method S2:** Determination of the molecular volume of H<sub>2</sub>O

Molar mass of water = 0.018 kg·mol<sup>-1</sup>.

∴ Number of molecules in 0.018 kg of water: 6·10<sup>23</sup> (Avogadro's number)

∴ Mass of one molecule of water =  $\frac{0.018}{6 \cdot 10^{23}}$  kg = 3·10<sup>-26</sup> kg

∴ Volume of a water molecule =  $\frac{Mass}{Density} = \frac{3 \cdot 10^{-26}}{1000}$  m<sup>3</sup> = 3·10<sup>-29</sup> m<sup>3</sup>

**Table S5:** Hydration number of choline, chloride, lithium and TFSI ions using their effective hydrated radii (R<sub>H</sub>) and Stokes radii (R<sub>s</sub>).

| Conc.<br>(mol·kg <sup>-1</sup> ) | Hydration number using effective hydrated radii R <sub>H</sub> |                 |                 |                   | Hydration number using Stokes radii R <sub>s</sub> |                 |                 |                   |
|----------------------------------|----------------------------------------------------------------|-----------------|-----------------|-------------------|----------------------------------------------------|-----------------|-----------------|-------------------|
|                                  | Ch <sup>+</sup>                                                | Cl <sup>-</sup> | Li <sup>+</sup> | TFSI <sup>-</sup> | Ch <sup>+</sup>                                    | Cl <sup>-</sup> | Li <sup>+</sup> | TFSI <sup>-</sup> |
| 1                                | 1.27                                                           | 3.83            | 5.94            | 2.35              | -4.05                                              | -4.78           | 0.667           | 1.558             |
| 5                                | 0.76                                                           | 3.58            | 4.12            | 1.62              | -4.40                                              | -4.82           | 0.064           | 0.535             |
| 10                               | 0.28                                                           | 3.41            | 4.45            | 3.13              | -4.58                                              | -4.87           | 0.100           | 2.176             |
| 15                               | 4.99                                                           | 3.29            | 3.92            | 0.41              | 0.06                                               | -4.91           | 0.022           | 0.413             |
| 20                               | 4.78                                                           | 3.37            | 2.71            | 0.04              | 1.66                                               | -4.89           | -0.013          | 0.329             |

**a**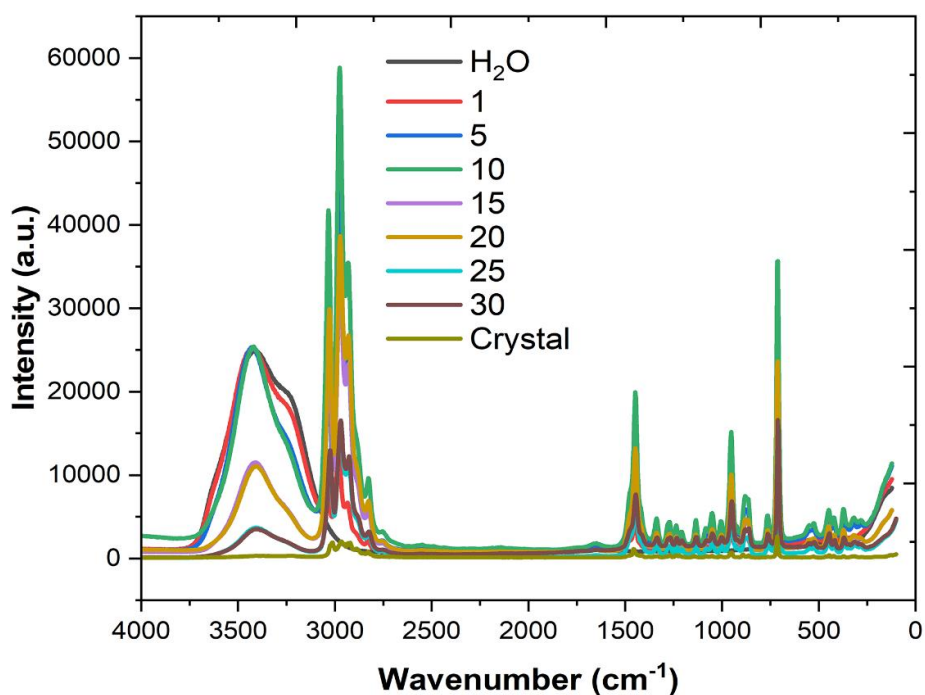**b**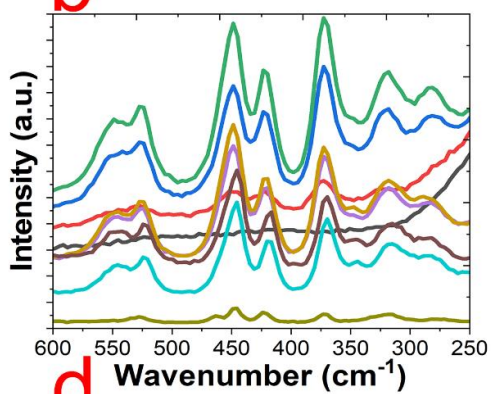**c**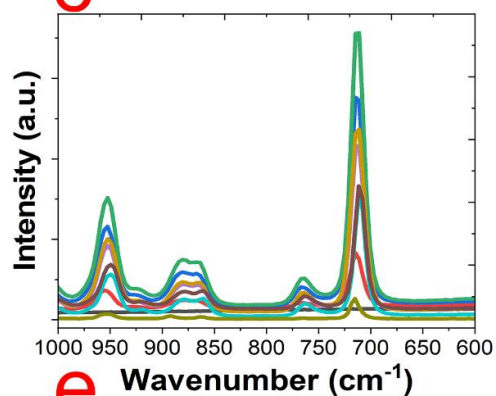**d**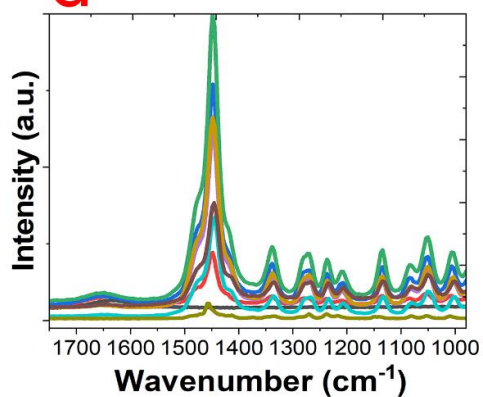**e**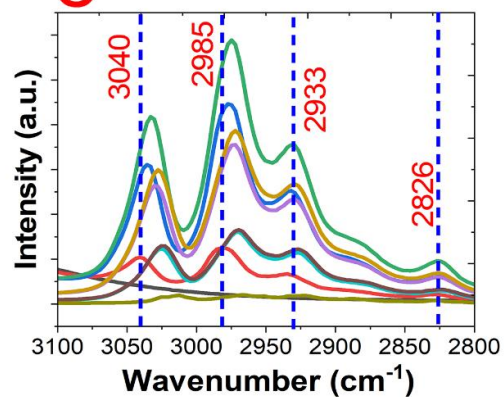

**Figure S4:** Raman spectra of DI water, crystalline ChCl and different bulk water-in-ChCl. **a)** Full spectra over 4000-120  $\text{cm}^{-1}$ , and enlarged solute bands over **b)** 600-250  $\text{cm}^{-1}$ , **c)** 1000-600  $\text{cm}^{-1}$ , **d)** 1700-980  $\text{cm}^{-1}$ , and **e)** 3100-2800  $\text{cm}^{-1}$ .



**Table S6:** Assignment of the Raman bands measured from the bulk water-in-ChCl solutions over 4000-120  $\text{cm}^{-1}$ .

| Band positions ( $\text{cm}^{-1}$ ) | Assignment                                                                                      | Literatures |
|-------------------------------------|-------------------------------------------------------------------------------------------------|-------------|
| 3420                                | asymmetric stretching vibration for pure water                                                  | [5]         |
| 3220                                | symmetric stretching vibration for pure water                                                   |             |
| 3228                                | weak band in the crystal ChCl, can be assigned to the O-H stretching vibration of $\text{Ch}^+$ |             |
| 3000                                | C-H asymmetric stretching vibration of methyl and methylene groups                              |             |
| 3019                                | $\text{CH}_3$ symmetric stretching, $\text{CH}_2$ symmetric stretching                          | [6]         |
| 2917                                | $\text{CH}_2\text{O}$ , C-H symmetric stretching                                                |             |
| 2961                                |                                                                                                 |             |
| 2811                                | CHO, CH stretching                                                                              |             |
| 1443                                | $\text{CH}_2$ scissoring, $\text{CH}_2$ out of plane bending                                    | [5]         |
| 1450                                | C-H scissor rocking of methyl and methylene groups                                              |             |
| 1335                                | $\text{CH}_2$ out of plane bending                                                              | [6]         |
| 1272                                | $\text{CH}_2$ out of plane bending, COH scissoring                                              |             |
| 1134                                | $\text{CH}_2$ out of plane bending vibration                                                    |             |
| 1049                                | C-C stretching                                                                                  |             |
| 1002                                | CN symmetric stretching                                                                         |             |
| 951                                 | two asymmetric stretching vibrations of C-N bonds                                               |             |
| 877                                 | symmetric stretching vibration of C-N bonds                                                     |             |
| 764                                 | $\text{CH}_2$ in-plane rocking vibration                                                        |             |
| 711                                 | assigned to total symmetric stretching vibration of the four C-N bonds                          |             |
| 720, 870                            | symmetric stretching vibration for C-N in crystal ChCl                                          |             |
| 705, 865                            | C-N vibration in aqueous ChCl solutions                                                         | [6]         |
| 734                                 | C-N vibration                                                                                   |             |
| 453                                 | -CH- bending vibration                                                                          |             |

## Water-in-LiTFSI

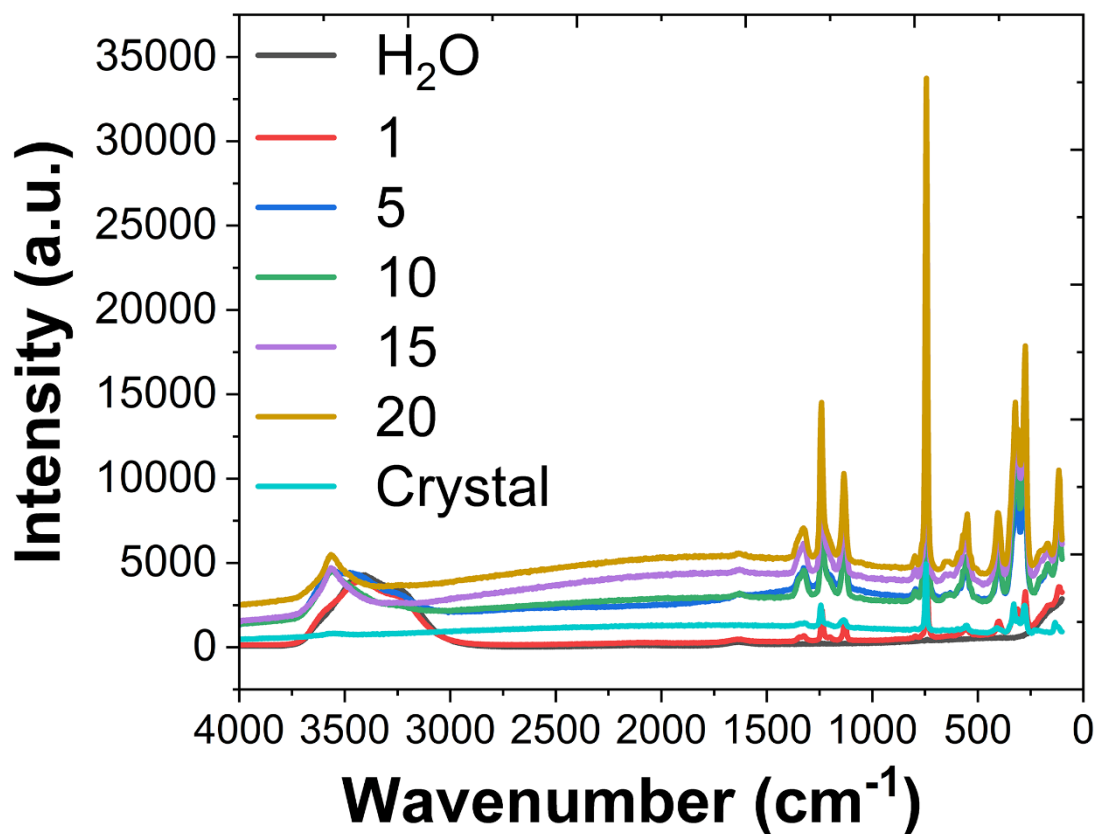

*Figure S5:* Raman spectra of DI water, crystalline LiTFSI and different bulk water-in-LiTFSI over 4000 to 120 cm<sup>-1</sup>

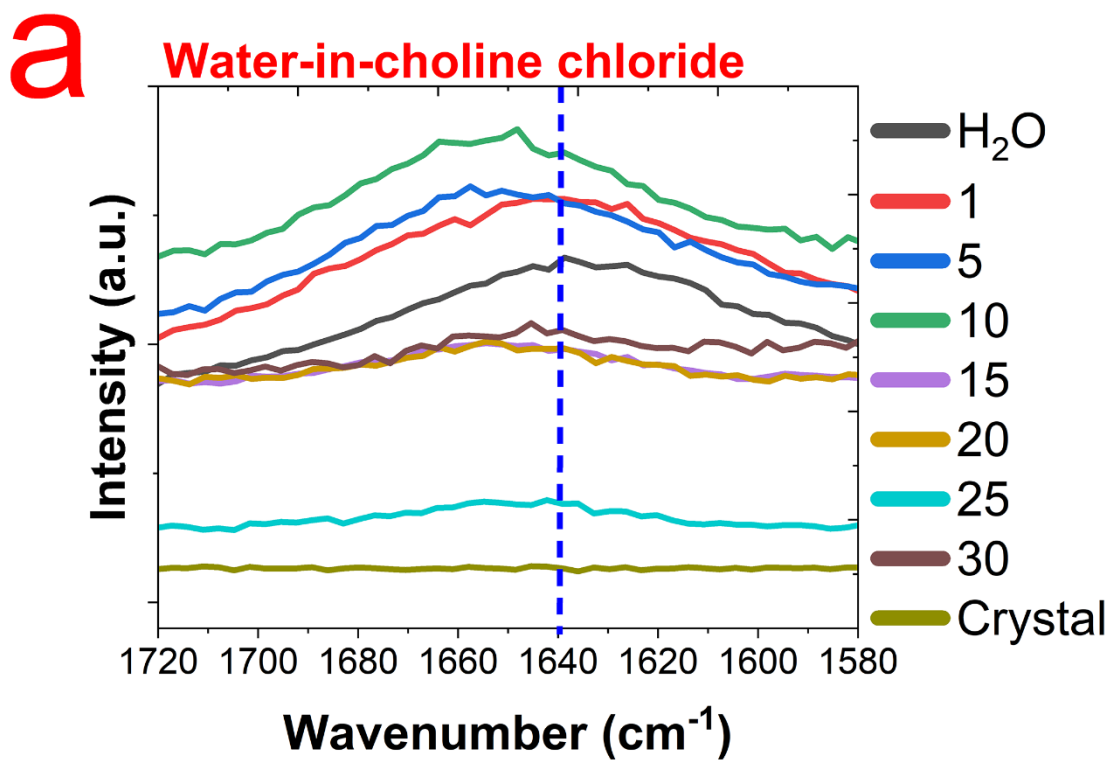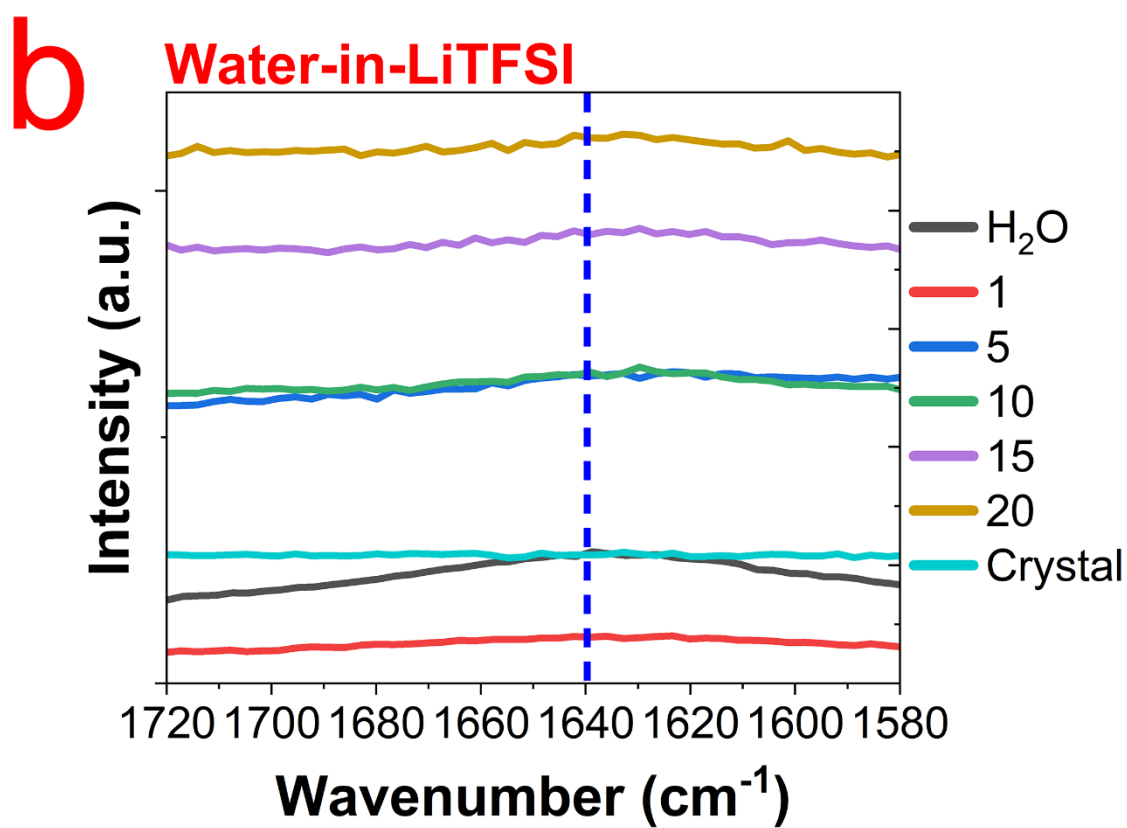

**Figure S6:** Changes in water band at  $1640 \text{ cm}^{-1}$  for different concentrations of **a)** ChCl and **b)** LiTFSI.

**Table S7:** Changes of peak intensity, position and width in water band at 1640 cm<sup>-1</sup> for different concentrations of ChCl.

| ChCl<br>(mol·kg <sup>-1</sup> ) | 1640-band                                              |                               |                            |
|---------------------------------|--------------------------------------------------------|-------------------------------|----------------------------|
|                                 | Intensity<br>/a.u.                                     | Position<br>/cm <sup>-1</sup> | Width<br>/cm <sup>-1</sup> |
| H <sub>2</sub> O                | 94.60                                                  | 1637.33                       | 83.63                      |
| 1                               | 97.37                                                  | 1643.68                       | 90.02                      |
| 5                               | 95.32                                                  | 1651.82                       | 72.03                      |
| 10                              | 94.90                                                  | 1653.04                       | 61.96                      |
| 15                              | 96.06                                                  | 1651.65                       | 53.59                      |
| 20                              | 97.41                                                  | 1651.58                       | 51.44                      |
| 25                              | No bands due to absence of<br>partially H-bonded water |                               |                            |
| 30                              |                                                        |                               |                            |

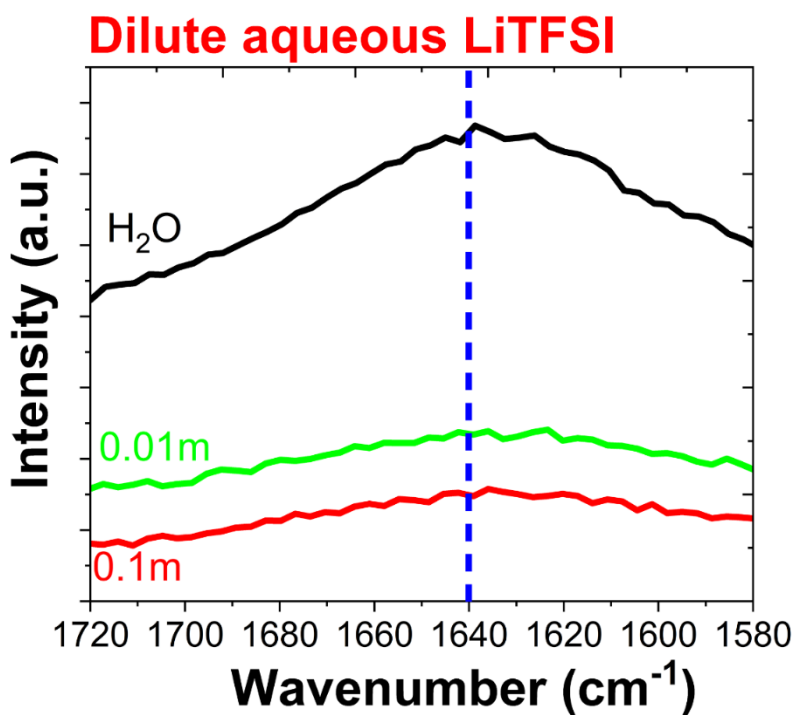

**Figure S7:** Evolution of water band at 1640 cm<sup>-1</sup> for different diluted aqueous LiTFSI solutions.

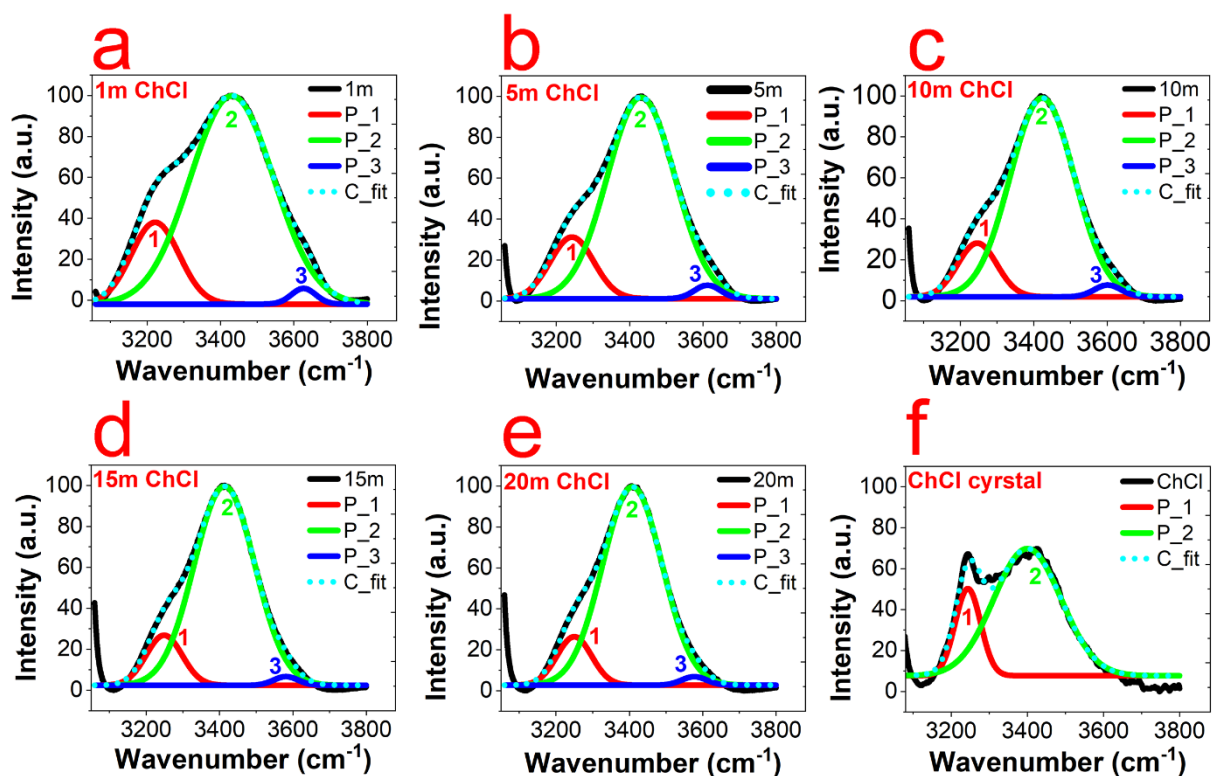

**Figure S8:** Gaussian deconvolution of several water bands at  $3220\text{ cm}^{-1}$  (P1-FHW),  $3430\text{ cm}^{-1}$  (P2-PHW1), and  $3610\text{ cm}^{-1}$  (P3-PHW2) for **a)**  $1\text{ mol}\cdot\text{kg}^{-1}$  ChCl, **b)**  $5\text{ mol}\cdot\text{kg}^{-1}$  ChCl, **c)**  $10\text{ mol}\cdot\text{kg}^{-1}$  ChCl, **d)**  $15\text{ mol}\cdot\text{kg}^{-1}$  ChCl, **e)**  $20\text{ mol}\cdot\text{kg}^{-1}$  ChCl, **f)** crystalline ChCl salt. Cyan dotted curve in each figure is indicating the cumulative fitting (Before deconvolution, baseline was corrected and then normalized).

**Table S8:** Intensity, position and width of water bands at  $3220\text{ cm}^{-1}$  (P1),  $3430\text{ cm}^{-1}$  (P2), and  $3610\text{ cm}^{-1}$  (P3) for different concentrations of ChCl.

| ChCl<br>( $\text{mol}\cdot\text{kg}^{-1}$ ) | 3220-band (C1)      |                             |                          | 3430-band (C2)      |                             |                          | 3610-band (C3)     |                             |                          | Chi-square | R-square |
|---------------------------------------------|---------------------|-----------------------------|--------------------------|---------------------|-----------------------------|--------------------------|--------------------|-----------------------------|--------------------------|------------|----------|
|                                             | Intensity /a.u.     | Position / $\text{cm}^{-1}$ | Width / $\text{cm}^{-1}$ | Intensity /a.u.     | Position / $\text{cm}^{-1}$ | Width / $\text{cm}^{-1}$ | Intensity /a.u.    | Position / $\text{cm}^{-1}$ | Width / $\text{cm}^{-1}$ |            |          |
| H <sub>2</sub> O                            | 42.58<br>$\pm 0.62$ | 3210.88<br>$\pm 0.62$       | 166.86<br>$\pm 1.03$     | 98.84<br>$\pm 0.49$ | 3423.54<br>$\pm 0.49$       | 289.16<br>$\pm 1.90$     | 6.44<br>$\pm 0.59$ | 3623.81<br>$\pm 0.76$       | 82.42<br>$\pm 2.73$      | 0.3874     | 0.99968  |
| 1                                           | 38.35 $\pm$<br>0.79 | 3221.89<br>$\pm 0.63$       | 154.29<br>$\pm 1.11$     | 99.91 $\pm$<br>0.42 | 3431.09<br>$\pm 0.39$       | 267.71<br>$\pm 1.54$     | 5.89 $\pm$<br>0.42 | 3626.37<br>$\pm 0.97$       | 77.69 $\pm$<br>3.21      | 0.47152    | 0.9996   |
| 5                                           | 31.93 $\pm$<br>0.47 | 3242.78<br>$\pm 2.81$       | 139.23<br>$\pm 4.98$     | 99.57 $\pm$<br>0.47 | 3430.99<br>$\pm 1.09$       | 217.27<br>$\pm 4.27$     | 7.82 $\pm$<br>0.79 | 3612.12<br>$\pm 4.69$       | 84.19 $\pm$<br>13.26     | 5.46562    | 0.99515  |
| 10                                          | 28.51 $\pm$<br>0.52 | 3246.18<br>$\pm 3.58$       | 125.53<br>$\pm 6.79$     | 98.91 $\pm$<br>0.72 | 3423.30<br>$\pm 1.29$       | 206.11<br>$\pm 5.22$     | 8.03 $\pm$<br>0.64 | 3601.76<br>$\pm 7.51$       | 86.09 $\pm$<br>19.89     | 9.48404    | 0.99143  |
| 15                                          | 26.97 $\pm$<br>0.79 | 3249.03<br>$\pm 4.35$       | 114.93<br>$\pm 8.41$     | 99.06 $\pm$<br>0.82 | 3413.44 $\pm$<br>1.55       | 194.84<br>$\pm 6.13$     | 6.97 $\pm$<br>0.52 | 3581.01<br>$\pm 11.47$      | 77.56 $\pm$<br>30.82     | 14.6620    | 0.98734  |
| 20                                          | 26.57 $\pm$<br>0.62 | 3249.85<br>$\pm 4.88$       | 111.04<br>$\pm 9.59$     | 99.61 $\pm$<br>0.48 | 3408.22<br>$\pm 1.79$       | 191.70<br>$\pm 6.93$     | 7.04 $\pm$<br>0.82 | 3576.9 $\pm$<br>13.731      | 79.82 $\pm$<br>35.63     | 17.9695    | 0.98398  |
| ChCl<br>crystalline                         | 50.28 $\pm$<br>0.42 | 3243.57<br>$\pm 2.75$       | 78.93<br>$\pm 7.31$      | 69.9 $\pm$<br>0.92  | 3400.01<br>$\pm 4.26$       | 208.07<br>$\pm 11.45$    | No bands           |                             |                          | 97.1344    | 0.85089  |

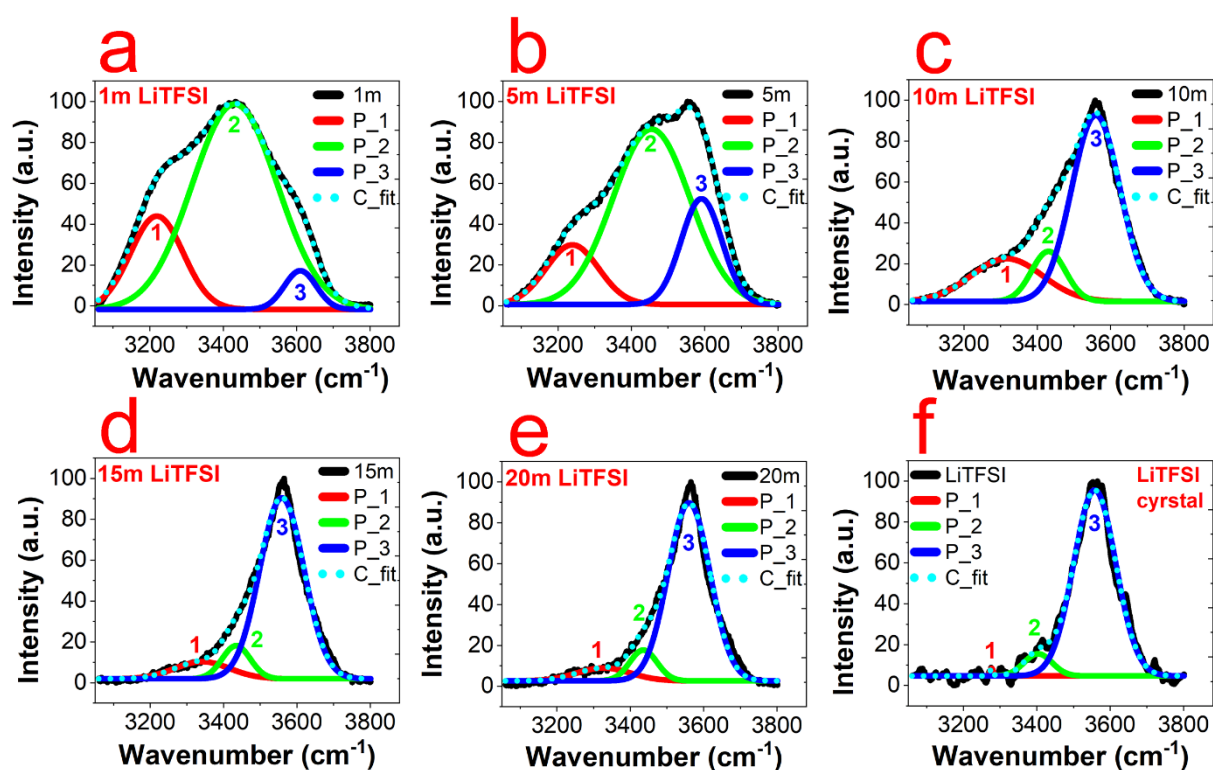

**Figure S9:** Gaussian deconvolution of several water bands at  $3220\text{ cm}^{-1}$  (P1),  $3430\text{ cm}^{-1}$  (P2), and  $3610\text{ cm}^{-1}$  (P3) for **a)**  $1\text{ mol}\cdot\text{kg}^{-1}$  LiTFSI, **b)**  $5\text{ mol}\cdot\text{kg}^{-1}$  LiTFSI, **c)**  $10\text{ mol}\cdot\text{kg}^{-1}$  LiTFSI, **d)**  $15\text{ mol}\cdot\text{kg}^{-1}$  LiTFSI, **e)**  $20\text{ mol}\cdot\text{kg}^{-1}$  LiTFSI, **f)** Crystalline LiTFSI salt. Cyan dotted curve in each figure indicates the cumulative fitting. Before deconvolution, baseline was corrected and then normalized.

**Table S9:** Intensity, position and width of water bands at  $3220\text{ cm}^{-1}$  (P1),  $3430\text{ cm}^{-1}$  (P2), and  $3610\text{ cm}^{-1}$  (P3) for different concentrations of LiTFSI.

| LiTFSI<br>( $\text{mol}\cdot\text{kg}^{-1}$ ) | 3220-band           |                                |                             | 3430-band           |                                |                             | 3610-band           |                                |                             | Chi-square | R-square |
|-----------------------------------------------|---------------------|--------------------------------|-----------------------------|---------------------|--------------------------------|-----------------------------|---------------------|--------------------------------|-----------------------------|------------|----------|
|                                               | Intensity<br>/a.u.  | Position<br>/ $\text{cm}^{-1}$ | Width<br>/ $\text{cm}^{-1}$ | Intensity<br>/a.u.  | Position<br>/ $\text{cm}^{-1}$ | Width<br>/ $\text{cm}^{-1}$ | Intensity<br>/a.u.  | Position<br>/ $\text{cm}^{-1}$ | Width<br>/ $\text{cm}^{-1}$ |            |          |
| H <sub>2</sub> O                              | 42.58<br>$\pm 0.62$ | 3210.88<br>$\pm 0.62$          | 166.86<br>$\pm 1.03$        | 98.84<br>$\pm 0.49$ | 3423.54<br>$\pm 0.49$          | 289.16<br>$\pm 1.90$        | 6.44<br>$\pm 0.59$  | 3623.81<br>$\pm 0.76$          | 82.42<br>$\pm 2.73$         | 0.3874     | 0.99968  |
| 1                                             | 43.71<br>$\pm 0.79$ | 3218.96<br>$\pm 0.89$          | 169.22<br>$\pm 1.23$        | 97.84<br>$\pm 0.41$ | 3431.36<br>$\pm 0.52$          | 274.43<br>$\pm 3.02$        | 17.50<br>$\pm 0.79$ | 3609.95<br>$\pm 0.56$          | 102.64<br>$\pm 2.42$        | 0.5135     | 0.99955  |
| 5                                             | 29.79<br>$\pm 0.42$ | 3239.17<br>$\pm 1.81$          | 169.19<br>$\pm 2.28$        | 89.67<br>$\pm 0.78$ | 3454.98<br>$\pm 2.34$          | 247.91<br>$\pm 6.07$        | 52.24<br>$\pm 0.91$ | 3591.14<br>$\pm 0.54$          | 130.49<br>$\pm 2.52$        | 0.8173     | 0.99928  |
| 10                                            | 22.23<br>$\pm 0.91$ | 3317.05<br>$\pm 11.02$         | 228.35<br>$\pm 16.65$       | 26.13<br>$\pm 0.65$ | 3430.40<br>$\pm 2.23$          | 109.02<br>$\pm 7.21$        | 92.78<br>$\pm 0.69$ | 3559.42<br>$\pm 0.94$          | 155.61<br>$\pm 1.89$        | 2.6747     | 0.99687  |
| 15                                            | 10.71<br>$\pm 0.62$ | 3341.71<br>$\pm 36.1$          | 176.27<br>$\pm 51.89$       | 19.43<br>$\pm 0.79$ | 3434.48<br>$\pm 3.85$          | 90.17<br>$\pm 13.52$        | 91.32<br>$\pm 0.73$ | 3558.94<br>$\pm 0.95$          | 142.29<br>$\pm 2.08$        | 6.48394    | 0.99179  |
| 20                                            | 8.91<br>$\pm 0.52$  | 3327.19<br>$\pm 32.22$         | 172.05<br>$\pm 57.39$       | 17.89<br>$\pm 0.42$ | 3435.62<br>$\pm 4.40$          | 87.38<br>$\pm 13.58$        | 87.96<br>$\pm 0.42$ | 3560.19<br>$\pm 0.97$          | 135.05<br>$\pm 2.29$        | 9.04132    | 0.98774  |
| LiTFSI<br>crystalline                         | 8.37<br>$\pm 0.41$  | 3276.85<br>$\pm 3.03$          | 9.97<br>$\pm 7.19$          | 15.63<br>$\pm 0.62$ | 3403.35<br>$\pm 4.05$          | 89.56<br>$\pm 9.44$         | 95.26<br>$\pm 0.49$ | 3557.95<br>$\pm 0.58$          | 135.29<br>$\pm 1.55$        | 10.73464   | 0.98685  |

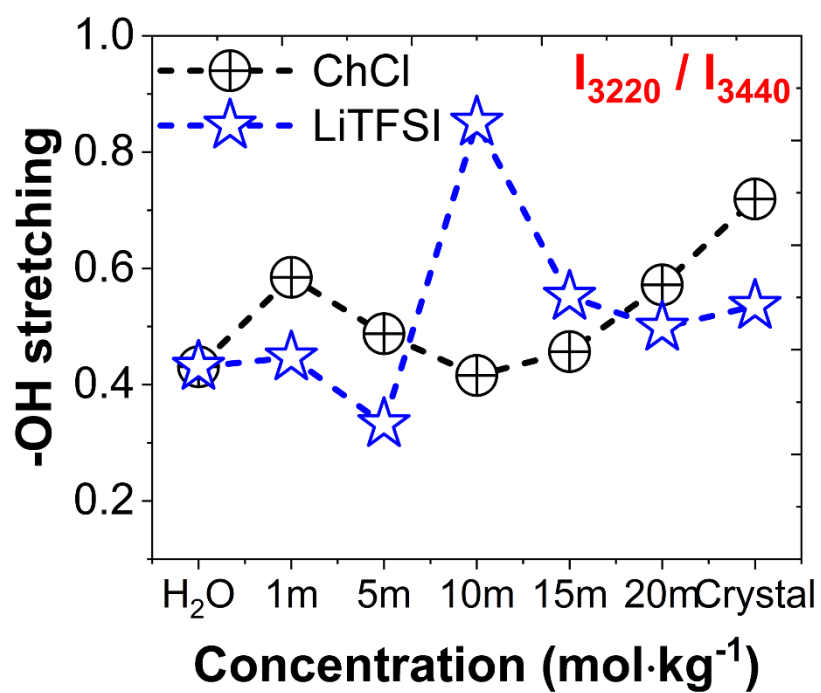

**Figure S10:** Intensity ratio of the -OH stretching bands at  $3200\text{ cm}^{-1}$  ( $I_{3220}$ ) and  $3440\text{ cm}^{-1}$  ( $I_{3440}$ ) for ChCl and LiTFSI. Connecting dotted lines are guide to the eye.

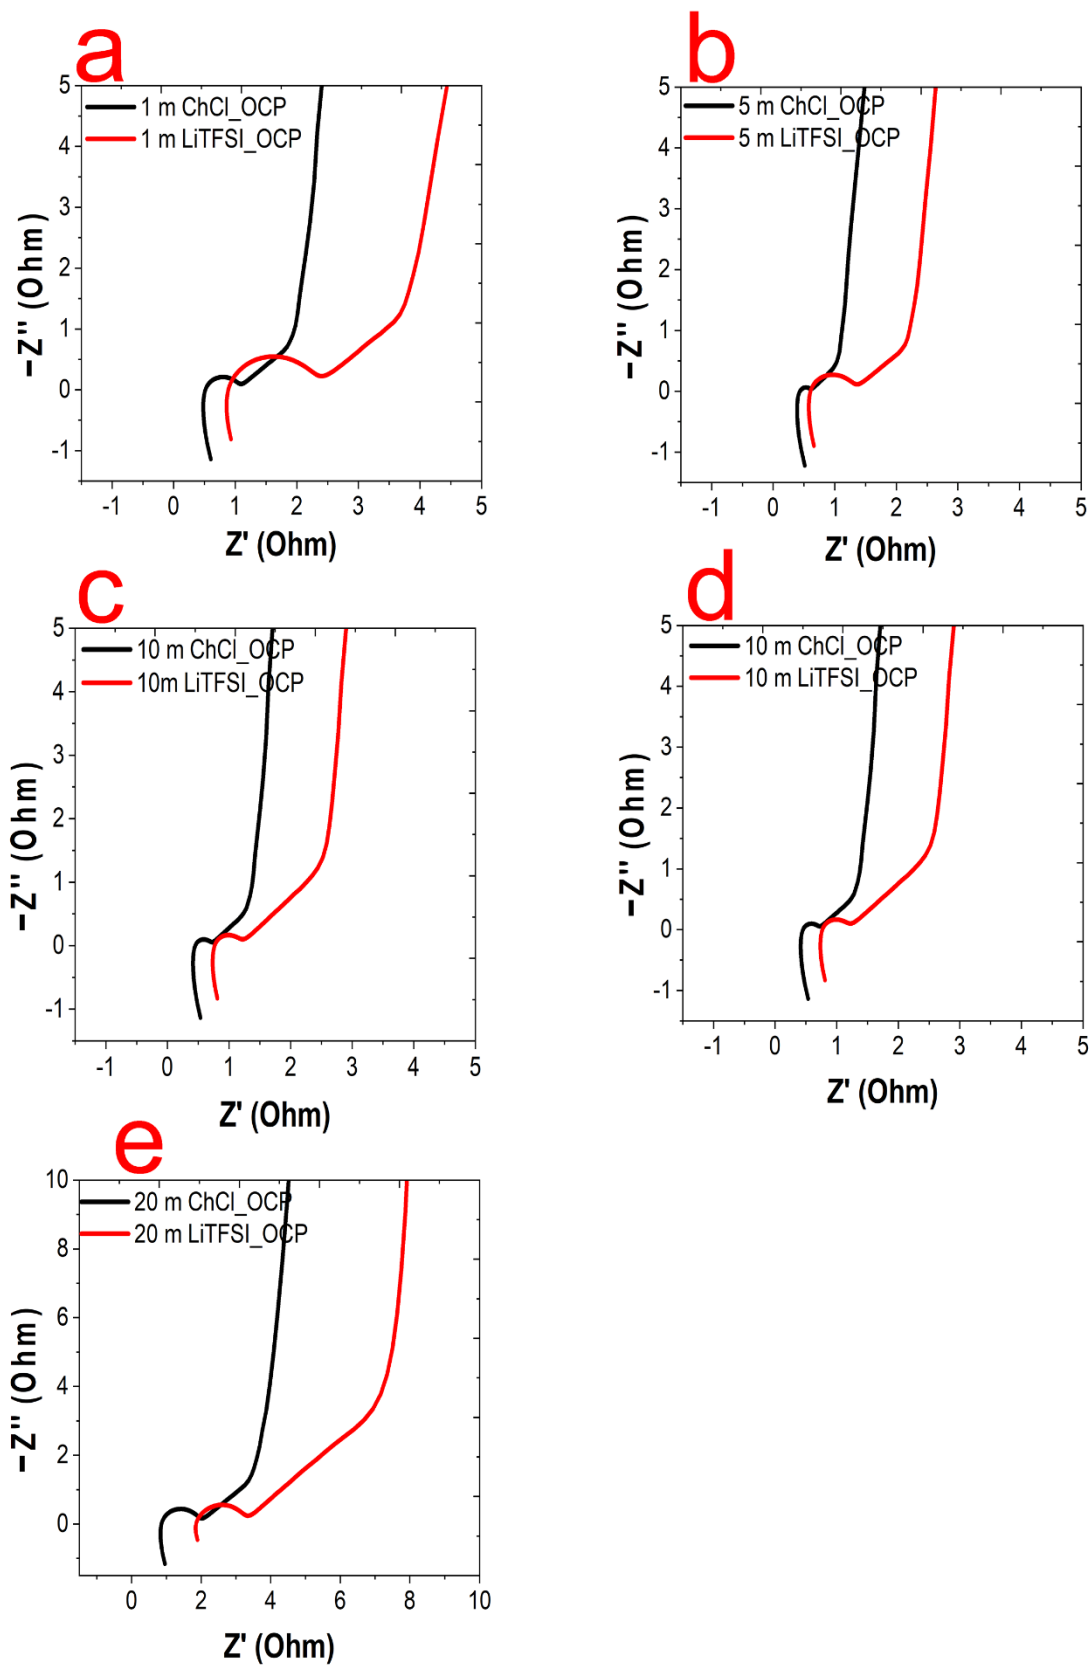

**Figure S11:** Nyquist plots of the electrochemical impedance spectra of capacitor cells operating under open circuit potential ( $\approx 30$  mV) for different concentrations of ChCl and LiTFSI **a)** 1, **b)** 5, **c)** 10, **d)** 15, and **e)** 20 mol $\cdot$ kg $^{-1}$ .



**Table 10:** Equivalent series resistance (ESR), charge transfer resistance (CTR), equivalent distribution resistance (EDR), and ion diffusion resistance (IDR) of the capacitor cells operated at open circuit potential ( $\approx 30$  mV) for different concentrations of ChCl and LiTFSI.

| Conc.<br>(mol.kg <sup>-1</sup> ) | Voltage<br>(V) | ESR (Ohm) |        | CTR (Ohm) |        | EDR (Ohm) |        | IDR (Ohm) |        |
|----------------------------------|----------------|-----------|--------|-----------|--------|-----------|--------|-----------|--------|
|                                  |                | ChCl      | LiTFSI | ChCl      | LiTFSI | ChCl      | LiTFSI | ChCl      | LiTFSI |
| 1                                | OCP            | 0.60      | 0.93   | 0.49      | 1.47   | 1.64      | 3.50   | 0.89      | 1.53   |
| 5                                |                | 0.51      | 0.66   | 0.12      | 0.69   | 0.84      | 1.89   | 0.43      | 0.86   |
| 10                               |                | 0.53      | 0.81   | 0.20      | 0.43   | 1.18      | 2.20   | 0.65      | 1.46   |
| 15                               |                | 0.64      | 1.35   | 0.60      | 1.19   | 1.91      | 4.80   | 0.99      | 2.70   |
| 20                               |                | 0.96      | 1.90   | 1.07      | 2.47   | 3.20      | 7.96   | 1.67      | 4.18   |

**Method S3:** Analysis of capacitance from EIS

Angular frequency:  $\omega = 2\pi \cdot F$  (S1)

Real part of the permittivity:  $\epsilon' = \frac{t}{A \cdot \omega \cdot \epsilon_0} \cdot \frac{Z''}{Z'^2 + Z''^2}$  (S2)

Imaginary part of the permittivity:  $\epsilon'' = \frac{t}{A \cdot \omega \cdot \epsilon_0} \cdot \frac{Z'}{Z'^2 + Z''^2}$  (S3)

Capacitance of ideal capacitor in vacuum:  $C_0 = \frac{A \cdot \epsilon_0}{t}$  (S4)

Real capacitance:  $C' = \epsilon' \cdot C_0$  (S5)

Imaginary capacitance:  $C'' = \epsilon'' \cdot C_0$  (S6)

Here,  $F$  is the characteristic frequency,  $A$  is the geometric area of the carbon electrode;  $t$  is the thickness of the carbon electrode;  $Z'$  is the real component of the impedance;  $Z''$  is the imaginary component of the impedance, and  $\epsilon_0$  is the vacuum permittivity.

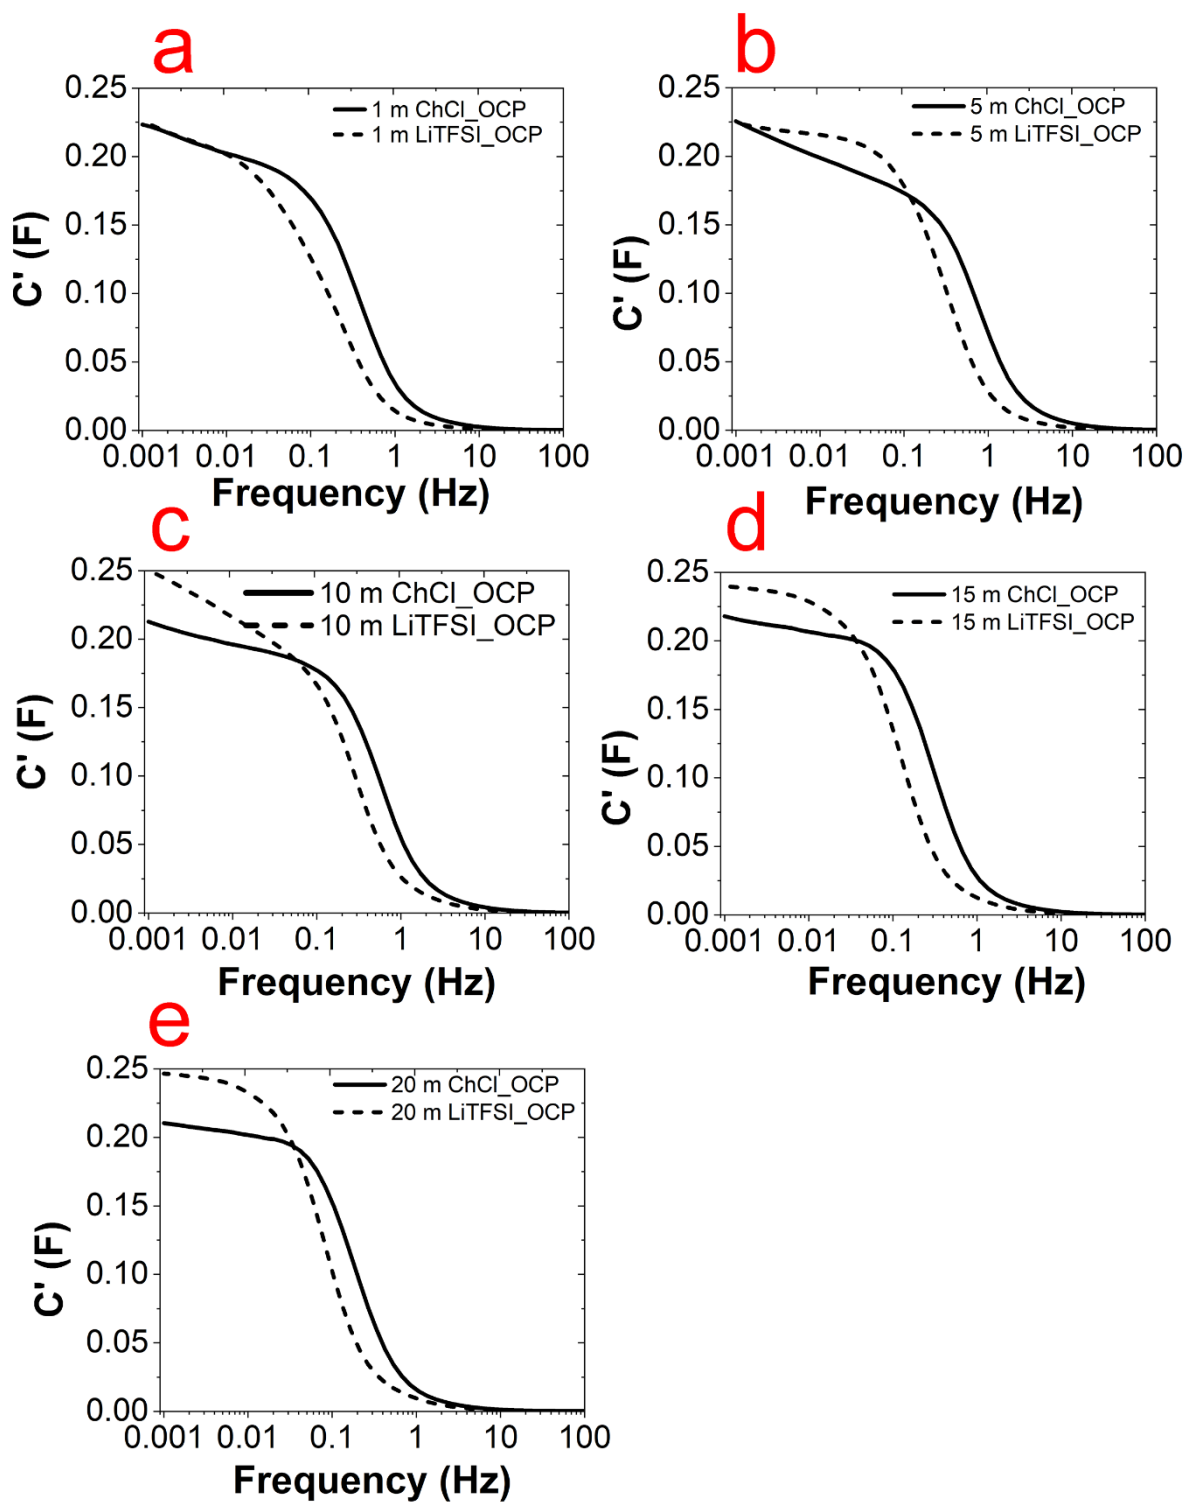

**Figure S12:** Real capacitance ( $C'$ ) from EIS of capacitor cells operating under open circuit potential for different concentrations of ChCl and LiTFSI a) 1 m, b) 5 m, c) 10 m, d) 15 m, and e) 20 mol·kg<sup>-1</sup>.

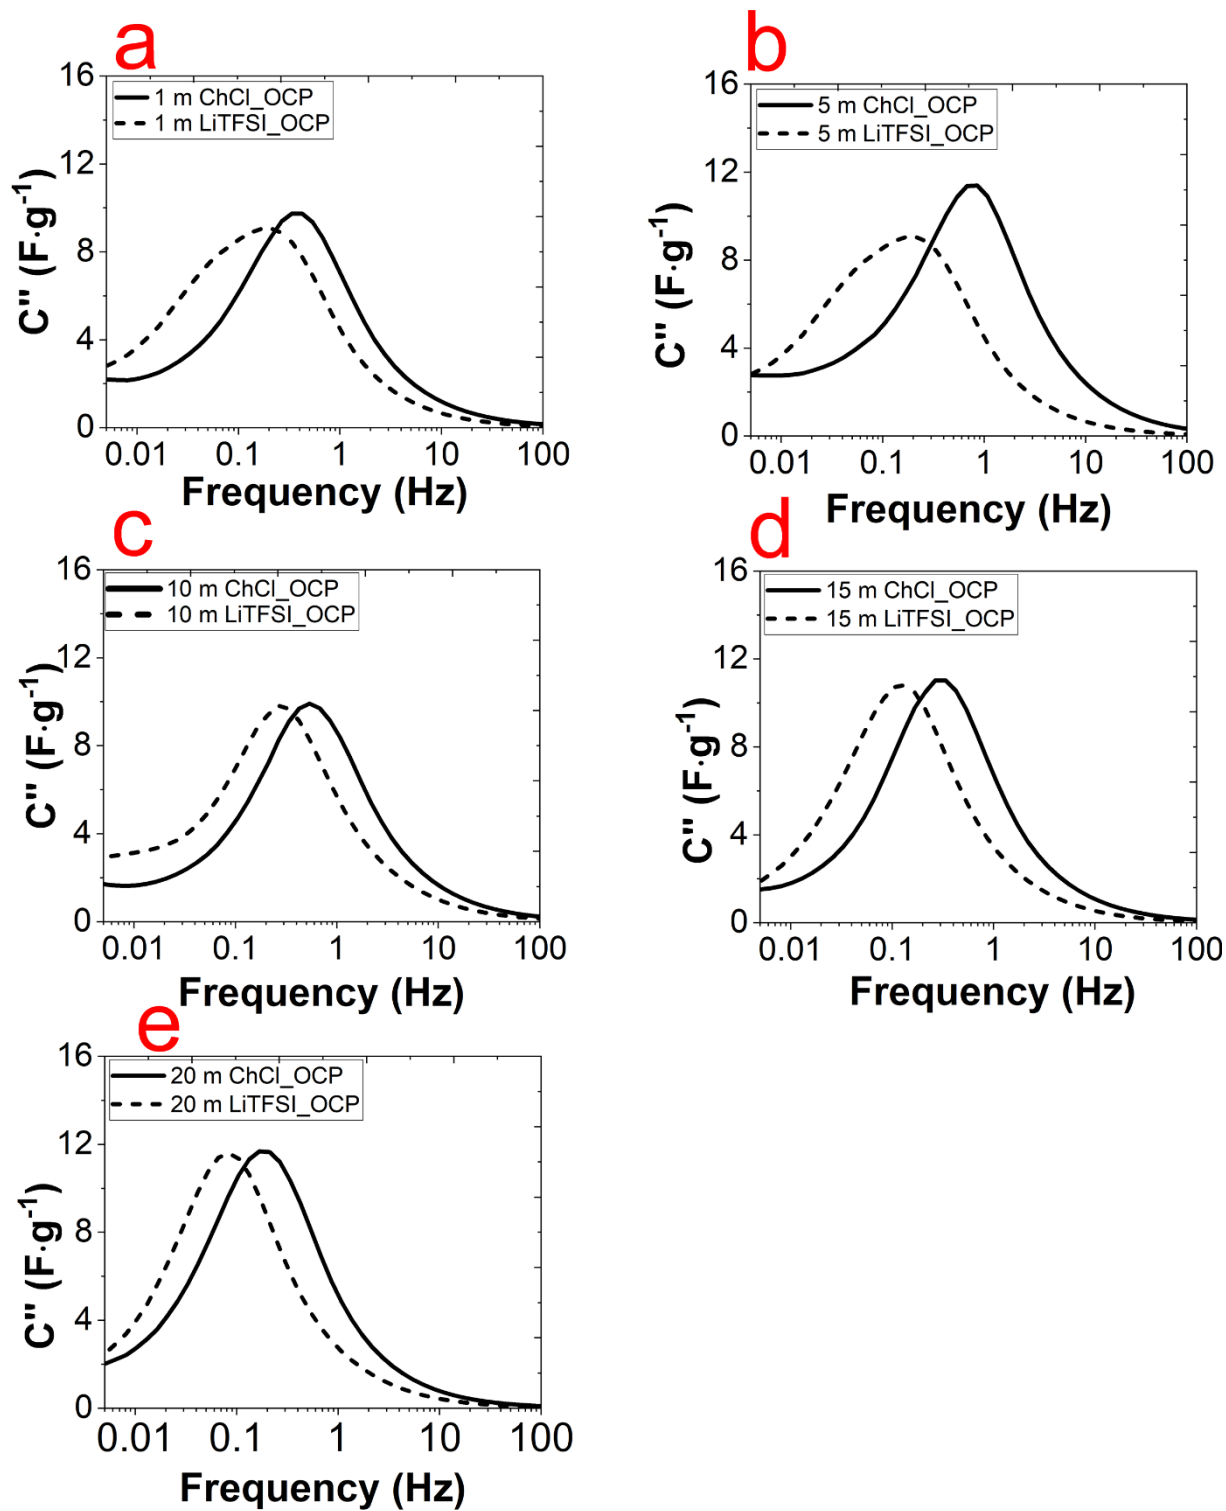

**Figure S13:** Imaginary capacitance ( $C''$ ) from EIS of capacitor cells operating open circuit potential for different concentrations of ChCl and LiTFSI a) 1, b) 5, c) 10, d) 15, and e) 20  $\text{mol}\cdot\text{kg}^{-1}$ .

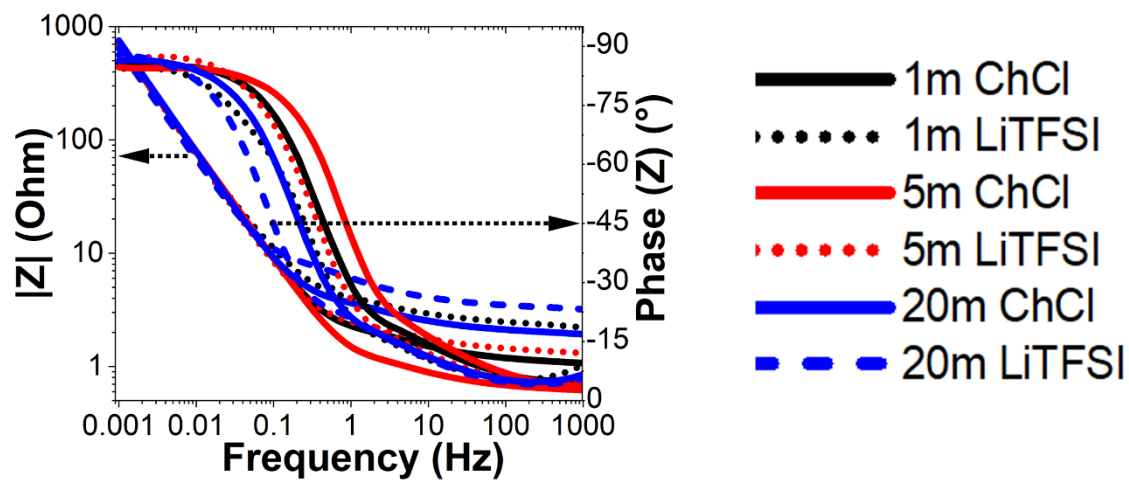

**Figure S14:** Bode plots of electrochemical impedance spectra of capacitor cells operating under open circuit potential for different concentrations of ChCl and LiTFSI

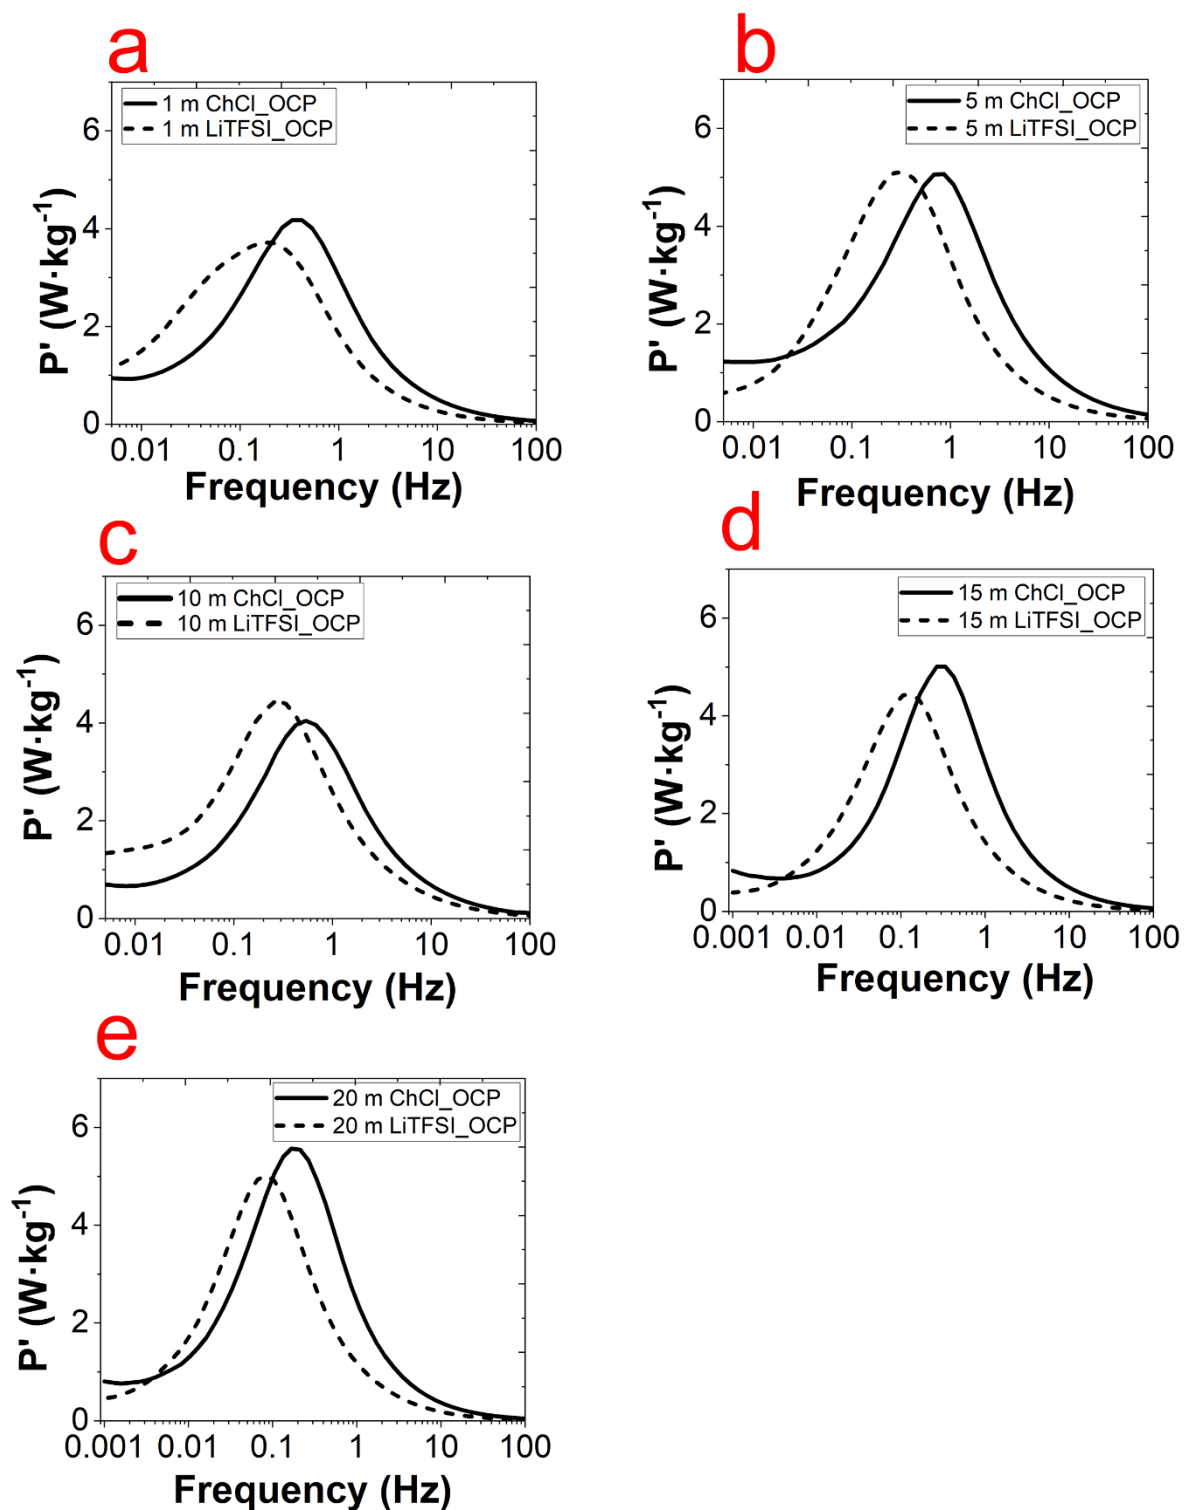

**Figure S15:** Real power ( $P'$ ) from EIS of capacitor cells operating under open circuit potential for different concentrations of ChCl and LiTFSI **a)** 1, **b)** 5, **c)** 10, **d)** 15, and **e)** 20  $\text{mol}\cdot\text{kg}^{-1}$ .

**Table S11:** Effect of salt concentration on the bulk electrolyte conductivity, in-pore ionic conductivity, bulk and in-pore ionic resistance, bulk to in-pore conductivity ratio, capacitance, and power density of capacitor cells under open circuit potential

| Salt conc.<br>(mol/kg) | $\sigma_{\text{in-bulk}}$<br>(mS/cm) | $\sigma_{\text{in-pore}}$<br>(mS/cm) | $R_{\text{in-bulk}}$<br>(Ohm·cm) | $R_{\text{in-pore}}$<br>(Ohm·cm) | $\sigma_{\text{bulk}} / \sigma_{\text{in-pore}}$<br>or<br>$R_{\text{in-pore}} / R_{\text{in-bulk}}$ | $D_{\text{bulk}} / D_{\text{in-pore}}$ |      | $C''_{\text{max}}$ (mF) | $C''_{\text{max}}$<br>(mF/cm <sup>2</sup> ) | $C''_{\text{max}}$ (F·g <sup>-1</sup> ) | $P'_{\text{max}}$ (W/kg) |
|------------------------|--------------------------------------|--------------------------------------|----------------------------------|----------------------------------|-----------------------------------------------------------------------------------------------------|----------------------------------------|------|-------------------------|---------------------------------------------|-----------------------------------------|--------------------------|
|                        |                                      |                                      |                                  |                                  |                                                                                                     | Micro                                  | Meso |                         |                                             |                                         |                          |
| 1 ChCl                 | 56.8                                 | 2.59                                 | 17.61                            | 386.3                            | 21.9                                                                                                | 29.9                                   | 3.4  | 83.7                    | 106.6                                       | 9.74                                    | 4.16                     |
| 1 LiTFSI               | 31.25                                | 1.53                                 | 32.0                             | 652.7                            | 20.4                                                                                                | 27.8                                   | 3.1  | 73.8                    | 94.0                                        | 9.05                                    | 3.72                     |
| 5 ChCl                 | 100                                  | 5.32                                 | 9.93                             | 187.8                            | 18.9                                                                                                | 32.5                                   | 3.6  | 81.3                    | 103.5                                       | 11.37                                   | <b>5.11</b>              |
| 5 LiTFSI               | 52.89                                | 2.22                                 | 18.9                             | 451.0                            | 23.85                                                                                               | 25.7                                   | 2.9  | 89.2                    | 113.5                                       | 10.83                                   | <b>5.08</b>              |
| 10 ChCl                | 77.1                                 | 5.25                                 | 12.97                            | 190.3                            | 14.7                                                                                                | 22.9                                   | 2.6  | 86.5                    | 110.2                                       | 9.91                                    | 4.04                     |
| 10 LiTFSI              | 38.34                                | 2.28                                 | 26.1                             | 438.8                            | 16.82                                                                                               | 20.0                                   | 2.2  | 87.9                    | 111.9                                       | 9.81                                    | 4.45                     |
| 15 ChCl                | 63.1                                 | 2.29                                 | 15.85                            | 437.0                            | 27.6                                                                                                | 23.8                                   | 2.7  | 95.5                    | 121.6                                       | 11.03                                   | 5.02                     |
| 15 LiTFSI              | 19.25                                | 1.10                                 | 51.9                             | 907.5                            | 17.47                                                                                               | 37.5                                   | 4.2  | 99.4                    | 126.6                                       | 10.81                                   | 4.45                     |
| 20 ChCl                | 40.8                                 | 1.50                                 | 24.49                            | 668.8                            | 27.3                                                                                                | 16.6                                   | 1.9  | 92.9                    | 118.3                                       | 11.68                                   | <b>5.58</b>              |
| 20 LiTFSI              | 11.10                                | 0.91                                 | 90.1                             | 1100.2                           | 12.22                                                                                               | 37.2                                   | 4.2  | 104.4                   | 132.9                                       | 11.60                                   | <b>4.96</b>              |

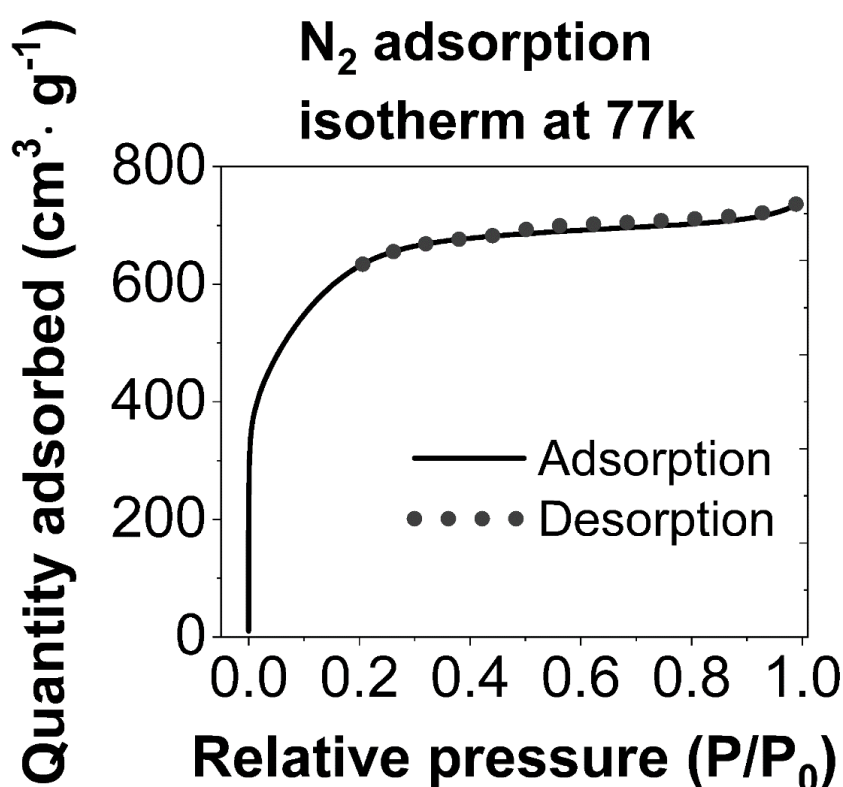

**Figure S16:** Nitrogen gas adsorption and desorption isotherm of YP80 F carbon electrode at 77 K.

**Method S4:** Determination of ion-pair (mutual) diffusivity from self-ion diffusivity<sup>7</sup>

According to the Nernst-Einstein equation, diffusivity of ion-pair  $D_\sigma$  using the experimental molar ionic conductivity  $\Lambda_{NE}$  can be derived from **equation 7**

$$D_\sigma = \frac{N_A \cdot e^2}{k_B \cdot T} \cdot \Lambda_{EIS} \quad \text{S7}$$

Here,  $N_A$  is Avogadro's number ( $6.023 \times 10^{23} \text{ mol}^{-1}$ ),  $e$  is the elementary charge ( $1.602 \times 10^{-19} \text{ C}$ ),

In addition, effective ionic diffusivities can be calculated from the PFG-NMR based self-ion diffusivity using **equations S8** and **S9**

$$D_+^{eff} = \frac{1}{2} (D_\sigma + D_+^{NMR} - D_-^{NMR}) \quad \text{S8}$$

$$D_-^{eff} = \frac{1}{2} (D_\sigma + D_-^{NMR} - D_+^{NMR}) \quad \text{S9}$$

As such we not only just separated the charged species from the neutral aggregates, but also eliminated part of the ionic diffusivities associated with interaction (friction) between ions whatsoever, even in the case where they did not form a complex with each other. In this regard,  $D_+^{eff}$  and  $D_-^{eff}$  would represent binary diffusivities required for the implementation of the concentrated solution theory based on the Onsager–Stefan–Maxwell formalism with **equation S10**<sup>7</sup>

$$D_{+-} = \frac{1}{2} (D_+^{eff} + D_-^{eff}) \quad \text{S10}$$

**Table S12:** Diffusivity of ions and water in bulk electrolyte, effective in-pore diffusivity of ions and water, tortuosity,  $R_{in-pore}$ ,  $C''_{max}$  within the micro and meso pores together with their cell time-constants and knee frequencies for different salt concentrations under open circuit potential.

| Salt (mol·kg <sup>-1</sup> ) | $D_{bulk}$ (10 <sup>-11</sup> · m <sup>2</sup> ·s <sup>-1</sup> ) |                  | Effective $D_{in-pore}$ (10 <sup>-11</sup> · m <sup>2</sup> ·s <sup>-1</sup> ) |       |                  |       | Effective Tortuosity |      | Effective $R_{in-pore}$ (Ohm·cm <sup>2</sup> ) |       | $C''_{max}$ (F·g <sup>-1</sup> ) |       | Time constant (ms) | $F$ (mHz) | $C''_{max}$ (F·g <sup>-1</sup> ) from EIS | $R_{in-pore}$ (Ohm·cm <sup>2</sup> ) from EIS |
|------------------------------|-------------------------------------------------------------------|------------------|--------------------------------------------------------------------------------|-------|------------------|-------|----------------------|------|------------------------------------------------|-------|----------------------------------|-------|--------------------|-----------|-------------------------------------------|-----------------------------------------------|
|                              | Salts                                                             | H <sub>2</sub> O | ChCl or LiTFSI                                                                 |       | H <sub>2</sub> O |       | Micro                | Meso | Micro                                          | Meso  | Micro                            | Meso  |                    |           |                                           |                                               |
|                              |                                                                   |                  | Micro                                                                          | Meso  | Micro            | Meso  |                      |      |                                                |       |                                  |       |                    |           |                                           |                                               |
| 1 m ChCl                     | 70.56                                                             | 190.1            | 2.36                                                                           | 21.02 | 6.36             | 56.63 | 25.48                | 0.50 | 2.10                                           | 18.75 | 96.55                            | 10.84 | 353.9              | 449.7     | 9.74                                      | 20.86                                         |
| 1 m LiTFSI                   | 41.13                                                             | 101.2            | 1.48                                                                           | 13.37 | 3.64             | 32.37 | 23.70                | 0.46 | 3.56                                           | 31.69 | 89.65                            | 10.07 | 527.4              | 301.8     | 9.05                                      | 35.25                                         |
| 5 m ChCl                     | 26.80                                                             | 144.3            | 1.04                                                                           | 9.27  | 5.59             | 49.79 | 21.97                | 0.43 | 1.02                                           | 9.12  | 112.7                            | 12.65 | 167.0              | 952.8     | 11.37                                     | 10.14                                         |
| 5 m LiTFSI                   | 13.14                                                             | 80.1             | 0.41                                                                           | 3.66  | 2.46             | 21.92 | 27.72                | 0.54 | 2.46                                           | 21.90 | 107.2                            | 12.04 | 440.0              | 361.7     | 10.83                                     | 24.36                                         |
| 10 m ChCl                    | 9.79                                                              | 82.74            | 0.33                                                                           | 2.95  | 4.14             | 36.83 | 17.05                | 0.33 | 1.04                                           | 9.24  | 98.25                            | 11.03 | 180.2              | 883.0     | 9.91                                      | 10.28                                         |
| 10 m LiTFSI                  | 4.79                                                              | 27.6             | 0.21                                                                           | 1.91  | 1.18             | 10.49 | 19.54                | 0.38 | 2.39                                           | 21.30 | 97.17                            | 10.92 | 421.9              | 377.2     | 9.81                                      | 23.69                                         |
| 15 m ChCl                    | 4.35                                                              | 50.5             | 0.12                                                                           | 1.03  | 1.35             | 11.97 | 32.03                | 0.63 | 2.38                                           | 21.21 | 109.3                            | 12.27 | 456.7              | 348.5     | 11.03                                     | 23.60                                         |
| 15 m LiTFSI                  | 1.55                                                              | 12.5             | 0.07                                                                           | 0.59  | 0.50             | 4.49  | 20.30                | 0.39 | 4.95                                           | 44.06 | 107.0                            | 12.02 | 987.3              | 161.2     | 10.81                                     | 49.01                                         |
| 20 m ChCl                    | 2.56                                                              | 35.1             | 0.07                                                                           | 0.61  | 0.94             | 8.40  | 31.73                | 0.62 | 3.64                                           | 32.47 | 115.8                            | 13.00 | 679.9              | 234.1     | 11.68                                     | 36.12                                         |
| 20 m LiTFSI                  | 0.71                                                              | 10.1             | 0.04                                                                           | 0.33  | 0.61             | 5.40  | 14.20                | 0.27 | 6.00                                           | 53.42 | 114.8                            | 12.90 | 1256.7             | 126.6     | 11.60                                     | 59.41                                         |



**Table S13:** In-pore diffusivity of the organic electrolytes  $\text{PET}_4\text{BF}_4$  and  $\text{TEABF}_4$  determined by in-situ NMR and electrochemical techniques. Borchardt et al. followed three methods<sup>8-10</sup> based on EIS to compare their in-situ NMR diffusivity values within micro, meso, and hierarchical pores.<sup>11</sup>

| Parameters                 | Forse <i>et al.</i> ( $10^{-11}\cdot\text{m}^2\cdot\text{s}^{-1}$ ) <sup>12</sup> |                 | Borchardt <i>et al.</i> ( $10^{-11}\cdot\text{m}^2\cdot\text{s}^{-1}$ ) <sup>11</sup> |                 |     |                                                                  |                                                               |                                                   |
|----------------------------|-----------------------------------------------------------------------------------|-----------------|---------------------------------------------------------------------------------------|-----------------|-----|------------------------------------------------------------------|---------------------------------------------------------------|---------------------------------------------------|
| Methods                    | In-situ NMR                                                                       |                 | In-situ NMR                                                                           |                 |     | EIS<br>(following<br>Armstrong<br>et al.) <sup>10</sup>          | EIS<br>(following<br>van Aken<br><i>et al.</i> ) <sup>9</sup> | EIS<br>(following<br>Ahuja<br>model) <sup>8</sup> |
| Carbon types               | YP50F and YP80F                                                                   |                 | Including YP50F and YP80F                                                             |                 |     |                                                                  |                                                               |                                                   |
| Electrolytes               | 1.5 M $\text{PET}_4\text{BF}_4$                                                   |                 | 1 M $\text{TEABF}_4$ in ACN                                                           |                 |     | 1 M $\text{TEABF}_4$                                             |                                                               |                                                   |
|                            | $\text{PET}_4^+$                                                                  | $\text{BF}_4^-$ | $\text{TEA}^+$                                                                        | $\text{BF}_4^-$ | ACN |                                                                  |                                                               |                                                   |
| $D_{\text{bulk}}$          | -                                                                                 | -               | 117                                                                                   | 142             | 439 | $\text{TEA}^+ + \text{BF}_4^- + \text{acetonitrile} \approx 698$ |                                                               |                                                   |
| $C_{\text{micro}}$ (YP80F) | -                                                                                 | 0.7-1.0         | 0.17                                                                                  | 0.20            | 13  | 0.12                                                             | 2400                                                          | 0.12                                              |
| $C_{\text{hierarch}}$      | -                                                                                 | -               | 0.087                                                                                 | 0.27            | 40  | 16                                                               | 11000                                                         | 0.15                                              |
| $C_{\text{meso}}$ (YP50F)  | 0.12 to<br>0.32                                                                   | 0.30-0.55       | 9                                                                                     | 12              | 60  | 5.2                                                              | 4600                                                          | 0.39                                              |

**Table S14:** Ion-pair size (nm) in ChCl and LiTFSI with corresponding cumulative surface area (CSA) at pore width similar to ion pair size and cumulative surface area (CSA%) for different salt concentrations.

| Ion pair type                  | Salt conc. (mol/kg) | Size of ion pair (nm) | Total CSA (m <sup>2</sup> /g) | CSA at the pore width similar to ion pair size (m <sup>2</sup> /g) | CSA%  |
|--------------------------------|---------------------|-----------------------|-------------------------------|--------------------------------------------------------------------|-------|
| <b>Cation-cation in ChCl</b>   | <b>1</b>            | 0.723                 | 1735.5                        | 479.02                                                             | 27.60 |
|                                | <b>5</b>            | 0.688                 |                               | 415.44                                                             | 23.94 |
|                                | <b>10</b>           | 0.671                 |                               | 384.52                                                             | 22.16 |
|                                | <b>15</b>           | 0.846                 |                               | 700.31                                                             | 40.35 |
|                                | <b>20</b>           | 0.945                 |                               | 850.61                                                             | 49.01 |
| <b>Anion-anion in ChCl</b>     | <b>1</b>            | 0.644                 | 1735.5                        | 340.77                                                             | 19.64 |
|                                | <b>5</b>            | 0.632                 |                               | 316.07                                                             | 18.21 |
|                                | <b>10</b>           | 0.624                 |                               | 304.07                                                             | 17.52 |
|                                | <b>15</b>           | 0.618                 |                               | 290.06                                                             | 16.71 |
|                                | <b>20</b>           | 0.622                 |                               | 298.09                                                             | 17.18 |
| <b>Cation-anion in ChCl</b>    | <b>1</b>            | 0.682                 | 1735.5                        | 410.44                                                             | 23.65 |
|                                | <b>5</b>            | 0.656                 |                               | 364.28                                                             | 20.99 |
|                                | <b>10</b>           | 0.647                 |                               | 340.77                                                             | 19.64 |
|                                | <b>15</b>           | 0.729                 |                               | 490.54                                                             | 28.27 |
|                                | <b>20</b>           | 0.781                 |                               | 597.56                                                             | 34.43 |
| <b>Cation-cation in LiTFSI</b> | <b>1</b>            | 0.701                 | 1735.5                        | 449.97                                                             | 25.93 |
|                                | <b>5</b>            | 0.623                 |                               | 298.086                                                            | 17.18 |
|                                | <b>10</b>           | 0.636                 |                               | 329.97                                                             | 19.01 |
|                                | <b>15</b>           | 0.612                 |                               | 278.24                                                             | 16.03 |
|                                | <b>20</b>           | 0.543                 |                               | 160.12                                                             | 9.23  |
| <b>Anion-anion in LiTFSI</b>   | <b>1</b>            | 0.744                 | 1735.5                        | 531.54                                                             | 30.63 |
|                                | <b>5</b>            | 0.718                 |                               | 479.03                                                             | 27.60 |
|                                | <b>10</b>           | 0.772                 |                               | 573.56                                                             | 33.05 |
|                                | <b>15</b>           | 0.671                 |                               | 390.54                                                             | 22.50 |
|                                | <b>20</b>           | 0.654                 |                               | 361.28                                                             | 20.82 |
| <b>Cation-anion in LiTFSI</b>  | <b>1</b>            | 0.722                 | 1735.5                        | 489.02                                                             | 28.18 |
|                                | <b>5</b>            | 0.669                 |                               | 389.52                                                             | 22.45 |
|                                | <b>10</b>           | 0.703                 |                               | 449.97                                                             | 25.93 |
|                                | <b>15</b>           | 0.641                 |                               | 334.77                                                             | 19.29 |
|                                | <b>20</b>           | 0.597                 |                               | 261.23                                                             | 15.05 |

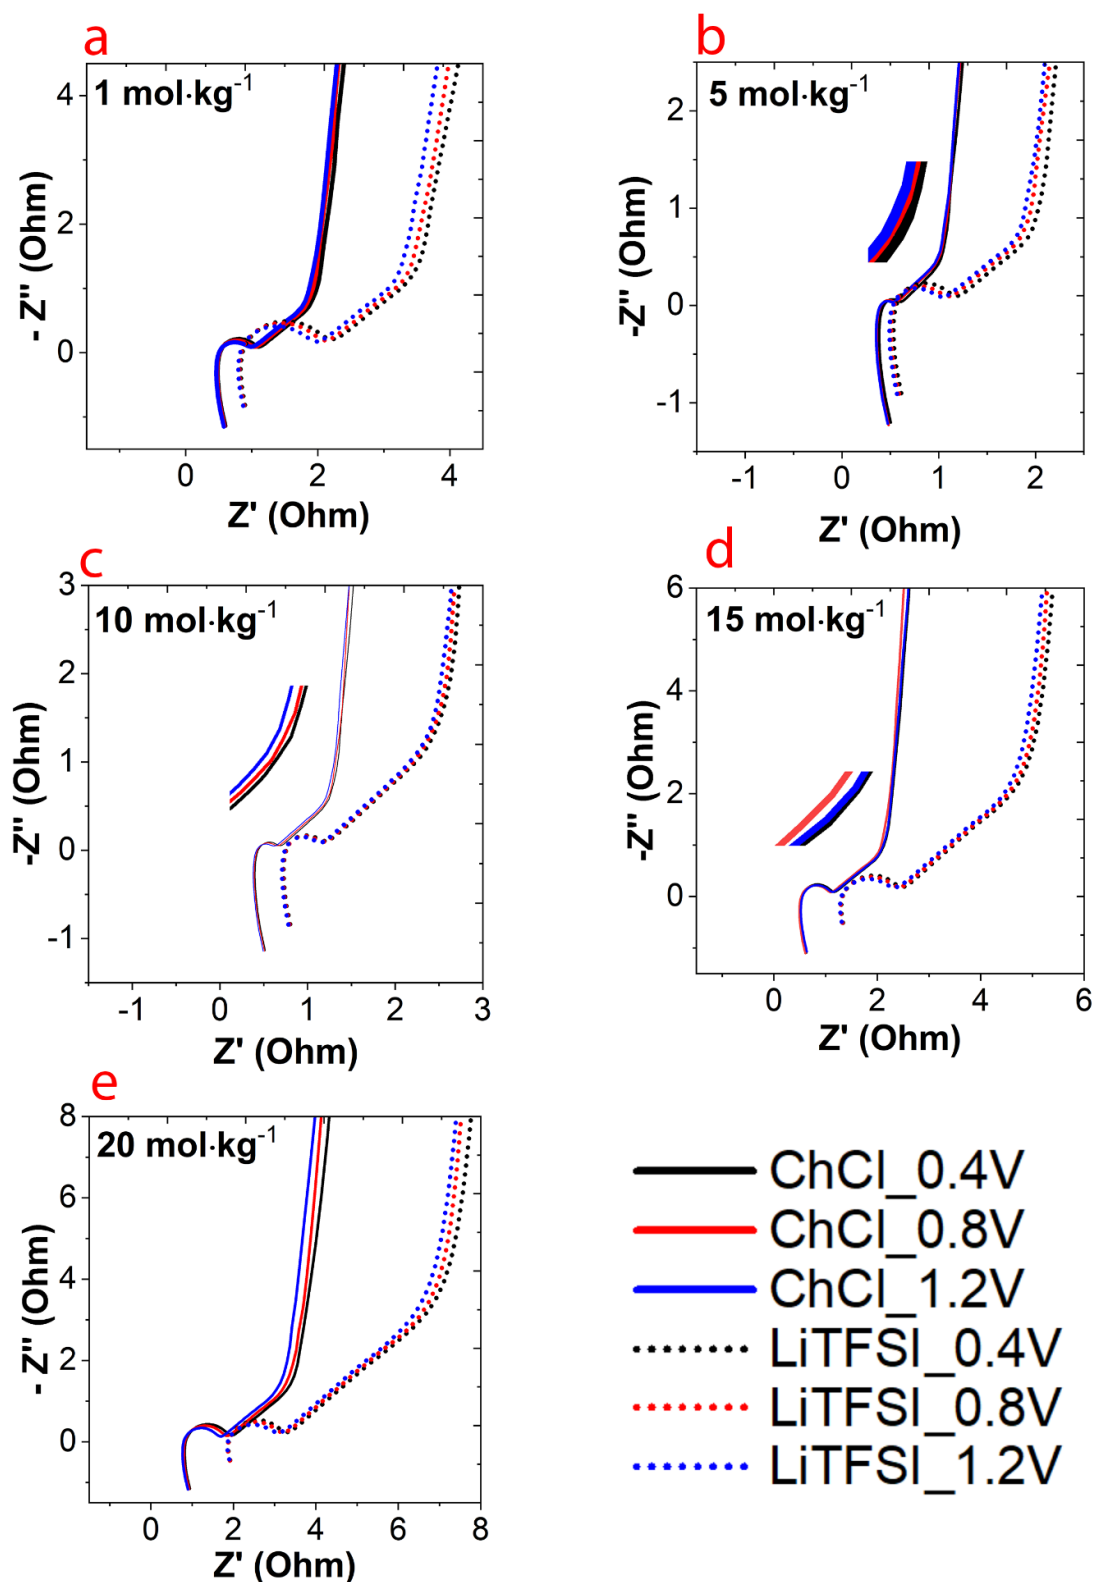

**Figure S17:** Nyquist plots of the electrochemical impedance spectra of the capacitor cells operating under different bias voltage for different concentrations of ChCl and LiTFSI a) 1, b) 5, c) 10, d) 15, and e) 20 mol·kg<sup>-1</sup>.

**Table S15:** Equivalent series resistance (ESR), charge transfer resistance (CTR), equivalent distribution resistance (EDR), and ion diffusion resistance (IDR) from the capacitor cells operating under different bias voltage for different concentrations choline chloride and LiTFSI

| Salt conc.<br>(mol·kg <sup>-1</sup> ) | Applied potential<br>(V) | ESR (Ohm) |        | CTR (Ohm) |        | EDR (Ohm) |        | IDR (Ohm) |        |
|---------------------------------------|--------------------------|-----------|--------|-----------|--------|-----------|--------|-----------|--------|
|                                       |                          | ChCl      | LiTFSI | ChCl      | LiTFSI | ChCl      | LiTFSI | ChCl      | LiTFSI |
| 1                                     | 0.4                      | 0.60      | 0.90   | 0.51      | 1.30   | 1.68      | 3.23   | 0.91      | 1.43   |
|                                       | 0.8                      | 0.59      | 0.88   | 0.44      | 1.21   | 1.61      | 3.14   | 0.90      | 1.38   |
|                                       | 1.2                      | 0.58      | 0.87   | 0.39      | 1.10   | 1.58      | 2.98   | 1.00      | 1.33   |
| 5                                     | 0.4                      | 0.50      | 0.61   | 0.10      | 0.56   | 0.81      | 1.70   | 0.44      | 0.84   |
|                                       | 0.8                      | 0.48      | 0.59   | 0.07      | 0.49   | 0.78      | 1.64   | 0.47      | 0.83   |
|                                       | 1.2                      | 0.47      | 0.57   | 0.04      | 0.46   | 0.76      | 1.56   | 0.49      | 0.79   |
| 10                                    | 0.4                      | 0.52      | 0.80   | 0.17      | 0.41   | 1.13      | 2.12   | 0.65      | 1.44   |
|                                       | 0.8                      | 0.51      | 0.79   | 0.13      | 0.40   | 1.03      | 2.08   | 0.66      | 1.36   |
|                                       | 1.2                      | 0.50      | 0.78   | 0.10      | 0.36   | 1.00      | 2.00   | 0.67      | 1.29   |
| 15                                    | 0.4                      | 0.63      | 1.33   | 0.53      | 1.15   | 1.87      | 4.57   | 1.05      | 2.65   |
|                                       | 0.8                      | 0.61      | 1.33   | 0.47      | 1.04   | 1.80      | 4.52   | 1.07      | 2.63   |
|                                       | 1.2                      | 0.64      | 1.31   | 0.46      | 1.00   | 1.84      | 4.33   | 1.06      | 2.54   |
| 20                                    | 0.4                      | 0.94      | 1.92   | 0.98      | 2.34   | 3.15      | 7.66   | 1.63      | 4.08   |
|                                       | 0.8                      | 0.92      | 1.91   | 0.90      | 2.23   | 3.02      | 7.48   | 1.65      | 4.01   |
|                                       | 1.2                      | 0.90      | 1.90   | 0.77      | 2.16   | 2.87      | 7.19   | 1.63      | 3.84   |

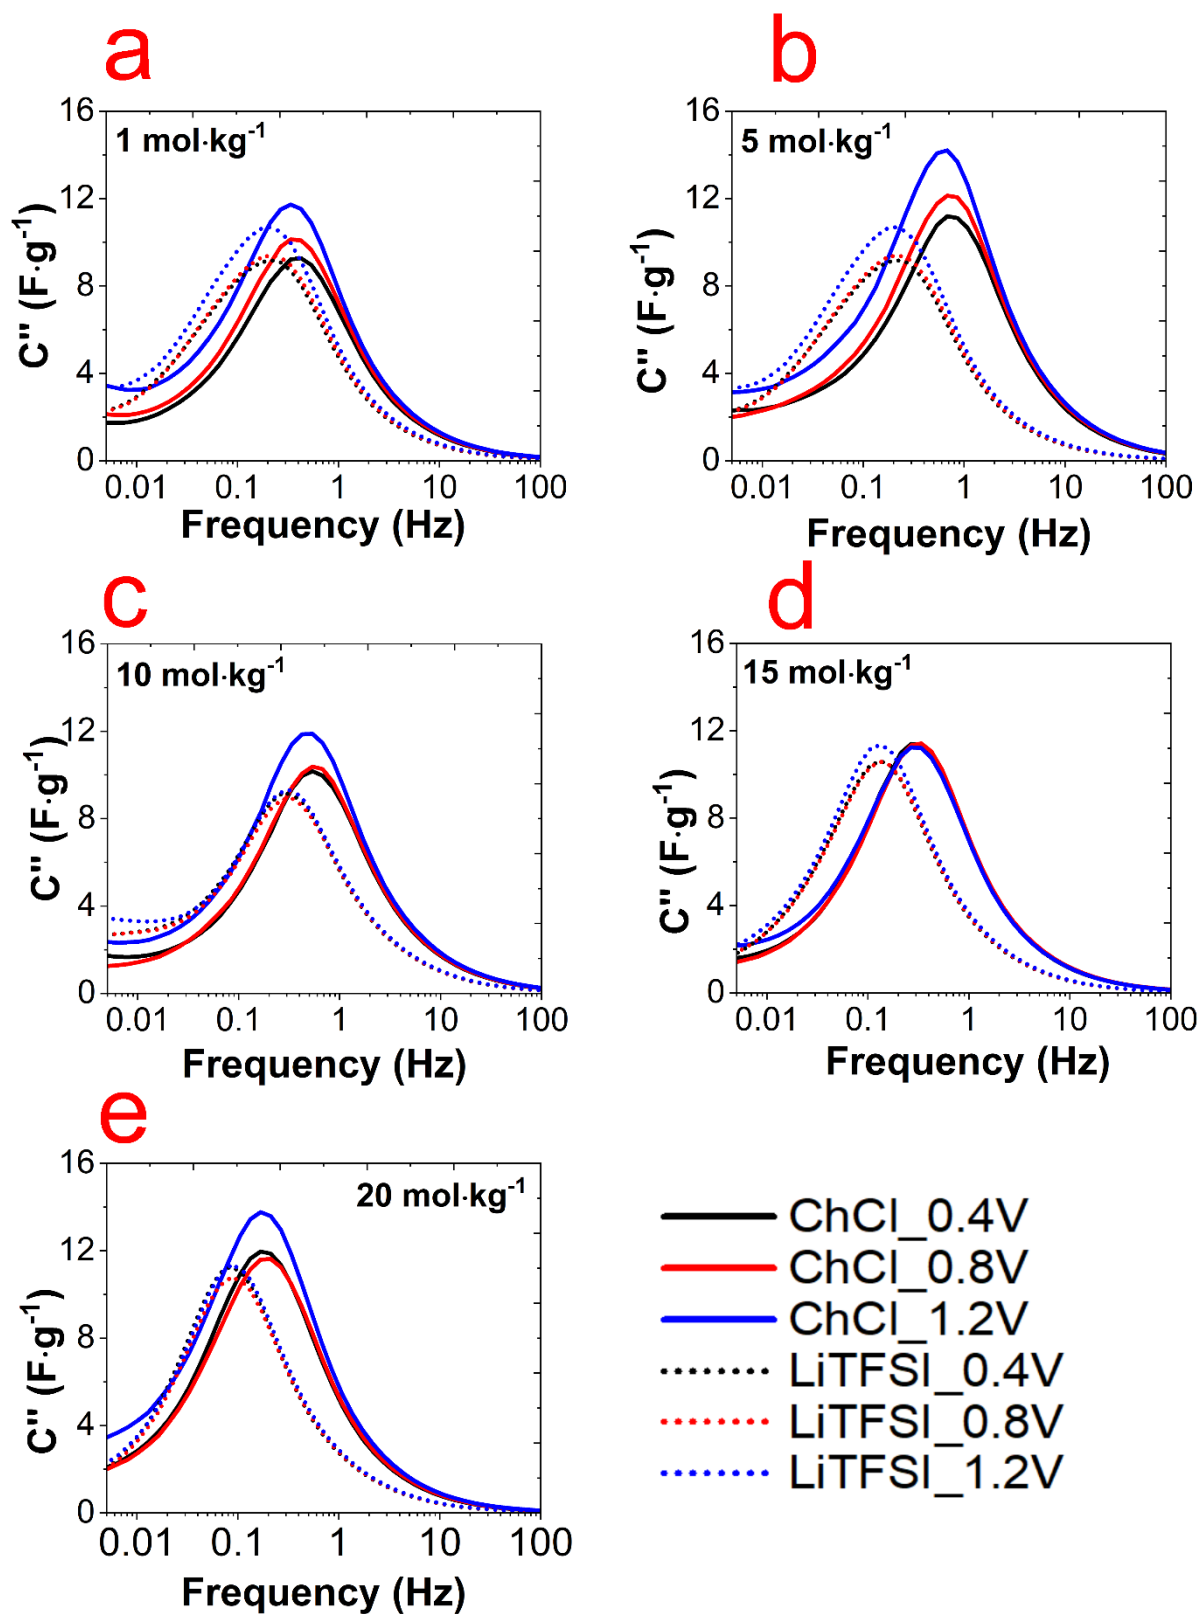

**Figure S18:** Imaginary capacitance ( $C''$ ) from EIS of capacitor cells operating under different bias voltages for different concentrations of ChCl and LiTFSI a) 1, b) 5, c) 10, d) 15, and e) 20  $\text{mol}\cdot\text{kg}^{-1}$

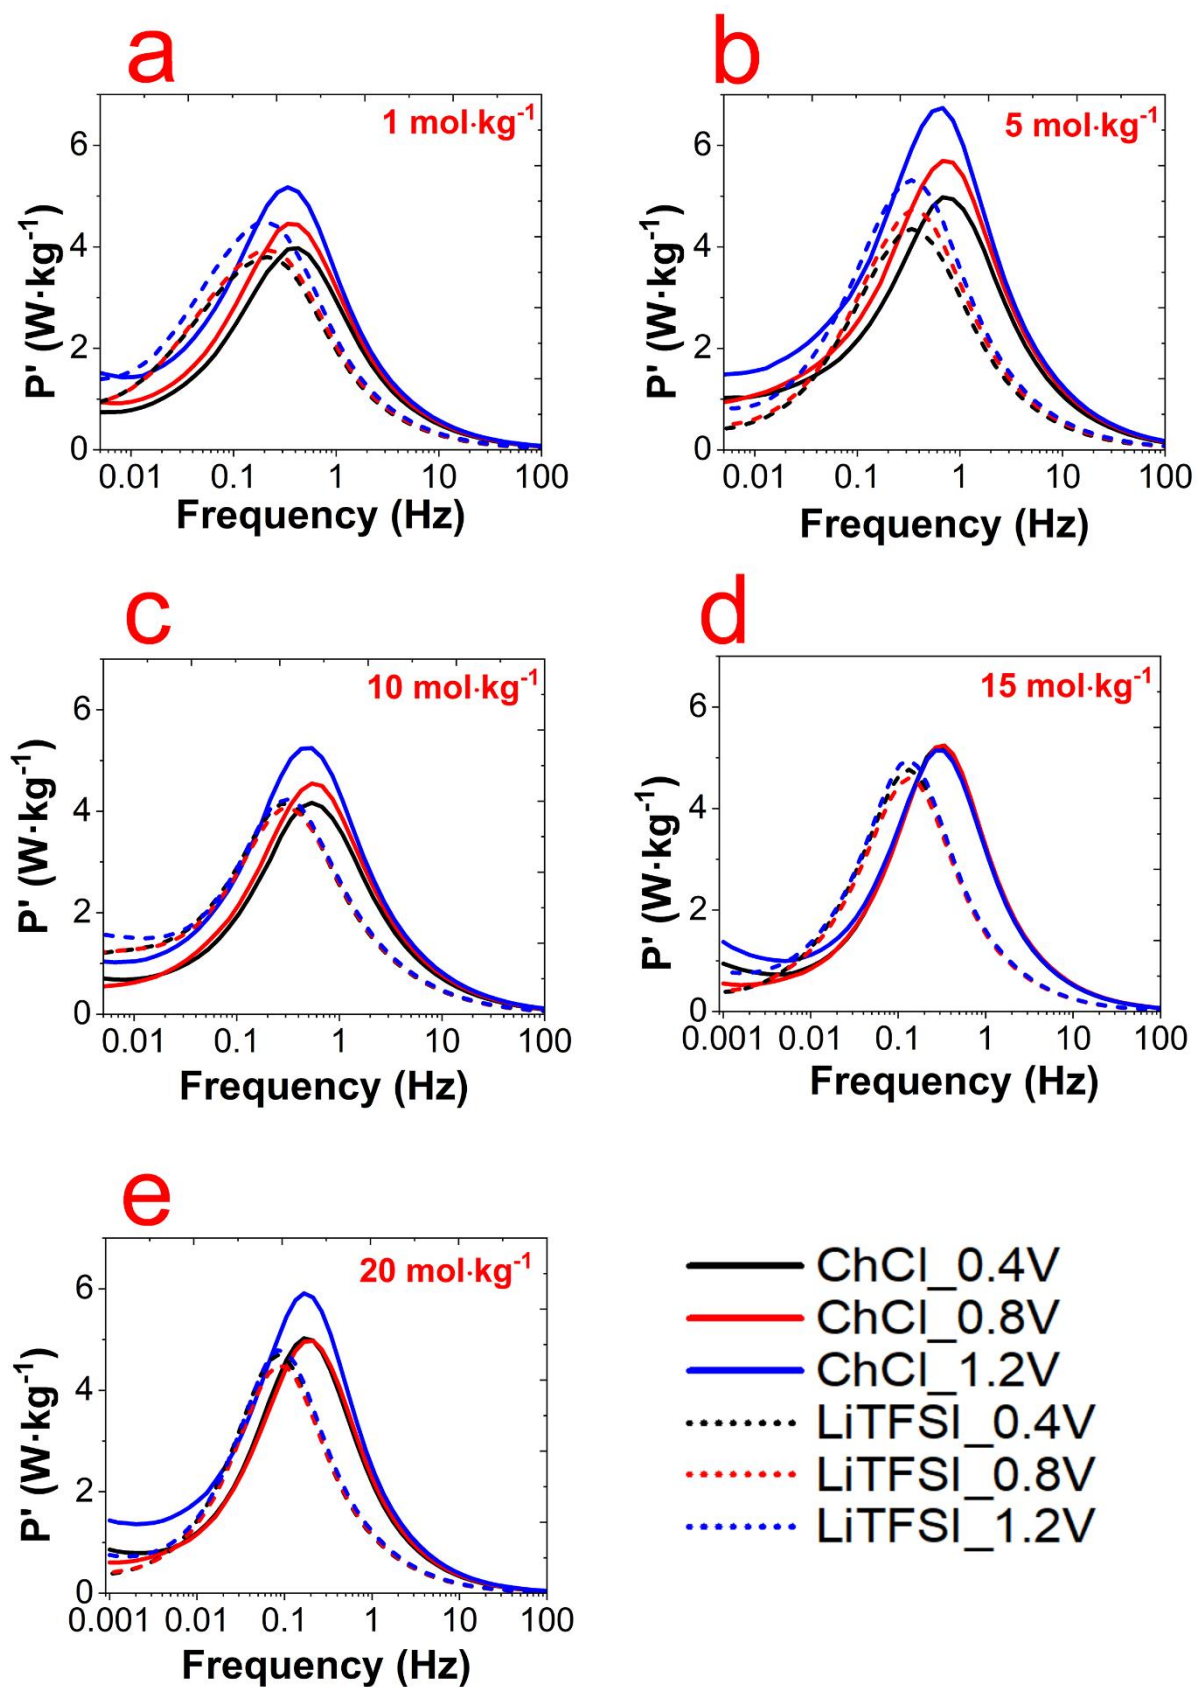

**Figure S19:** Real power ( $P'$ ) from EIS of capacitor cells operating under different bias voltages for different concentrations of ChCl and LiTFSI a) 1, b) 5, c) 10, d) 15, and e) 20 mol·kg<sup>-1</sup>.

**Table S16:** Effect of salt concentration and applied voltage on the effective in-pore ion diffusivity, tortuosity,  $R_{in-pore}$ ,  $C''_{max}$  in the micro and meso pores together with their cell time-constant values and knee frequencies

| Salt (mol·kg <sup>-1</sup> ) | Applied potential (V) | $D_{bulk}$ (10 <sup>-11</sup> ·m <sup>2</sup> ·s <sup>-1</sup> ) | Effective $D_{in-pore}$ (10 <sup>-11</sup> ·m <sup>2</sup> ·s <sup>-1</sup> ) |               | Effective Tortuosity |             | $R_{in-pore}$ (Ohm·cm <sup>2</sup> ) |              |                | $C''_{max}$ (F·g <sup>-1</sup> ) |              |                | Time constant (ms) | F (mHz)      | $P'_{max}$ (W·kg <sup>-1</sup> ) |
|------------------------------|-----------------------|------------------------------------------------------------------|-------------------------------------------------------------------------------|---------------|----------------------|-------------|--------------------------------------|--------------|----------------|----------------------------------|--------------|----------------|--------------------|--------------|----------------------------------|
|                              |                       |                                                                  | Micro                                                                         | Meso          | Micro                | Meso        | Micro                                | Meso         | Total from EIS | Micro                            | Meso         | Total from EIS |                    |              |                                  |
| 1 m ChCl                     | 0.4                   | 70.56                                                            | 2.407                                                                         | 21.425        | 25.52                | 0.50        | 2.22                                 | 19.75        | 21.97          | 91.91                            | 10.32        | 9.27           | 354.9              | 448.5        | 3.98                             |
|                              | 0.8                   |                                                                  | 2.738                                                                         | 24.374        | 22.44                | 0.44        | 1.95                                 | 17.34        | 19.29          | 100.3                            | 11.27        | 10.13          | 340.2              | 467.8        | 4.47                             |
|                              | 1.2                   |                                                                  | 3.251                                                                         | 28.941        | 18.90                | 0.37        | 1.65                                 | 14.74        | 16.40          | 116.2                            | 13.04        | 11.72          | 334.9              | 475.2        | 5.19                             |
| 1 m LiTFSI                   | 0.4                   | 41.13                                                            | 1.630                                                                         | 14.724        | 21.53                | 0.42        | 3.39                                 | 30.19        | 33.58          | 90.94                            | 10.22        | 9.18           | 509.6              | 312.3        | 3.81                             |
|                              | 0.8                   |                                                                  | 0.541                                                                         | 4.884         | 20.74                | 0.40        | 3.29                                 | 29.25        | 32.54          | 93.14                            | 10.46        | 9.41           | 505.7              | 314.7        | 3.92                             |
|                              | 1.2                   |                                                                  | 0.231                                                                         | 2.088         | 17.69                | 0.34        | 2.81                                 | 25.04        | 27.85          | 105.8                            | 11.89        | 10.69          | 491.8              | 323.6        | 4.49                             |
| 5 m ChCl                     | 0.4                   | 26.8                                                             | 1.032                                                                         | 9.185         | 22.16                | 0.44        | 1.04                                 | 9.31         | 10.35          | 110.9                            | 12.45        | 11.19          | 167.9              | 947.8        | 4.95                             |
|                              | 0.8                   |                                                                  | 1.070                                                                         | 9.527         | 21.36                | 0.42        | 1.01                                 | 9.00         | 10.01          | 120.2                            | 13.49        | 12.13          | 176.0              | 904.1        | 5.73                             |
|                              | 1.2                   |                                                                  | <b>1.226</b>                                                                  | <b>10.910</b> | <b>18.65</b>         | <b>0.37</b> | <b>0.88</b>                          | <b>7.87</b>  | <b>8.76</b>    | <b>140.8</b>                     | <b>15.80</b> | <b>14.20</b>   | <b>180.2</b>       | <b>883.0</b> | <b>6.78</b>                      |
| 5 m LiTFSI                   | 0.4                   | 13.14                                                            | 0.054                                                                         | 0.486         | 24.60                | 0.48        | 2.22                                 | 19.78        | 22.00          | 106.0                            | 11.91        | 10.71          | 393.1              | 404.9        | 4.36                             |
|                              | 0.8                   |                                                                  | 0.026                                                                         | 0.235         | 23.29                | 0.45        | 2.11                                 | 18.74        | 20.85          | 109.5                            | 12.31        | 11.06          | 384.9              | 413.5        | 4.73                             |
|                              | 1.2                   |                                                                  | <b>0.518</b>                                                                  | <b>4.679</b>  | <b>21.65</b>         | <b>0.42</b> | <b>1.97</b>                          | <b>17.50</b> | <b>19.46</b>   | <b>119.2</b>                     | <b>13.39</b> | <b>12.04</b>   | <b>390.9</b>       | <b>407.1</b> | <b>5.33</b>                      |
| 10 m ChCl                    | 0.4                   | 9.79                                                             | 0.518                                                                         | 4.607         | 16.14                | 0.32        | 1.01                                 | 8.96         | 9.97           | 100.8                            | 11.31        | 10.17          | 179.3              | 887.6        | 4.25                             |
|                              | 0.8                   |                                                                  | 0.506                                                                         | 4.501         | 16.52                | 0.32        | 1.03                                 | 9.15         | 10.18          | 102.9                            | 11.55        | 10.38          | 187.0              | 851.1        | 4.61                             |
|                              | 1.2                   |                                                                  | 0.583                                                                         | 5.192         | 14.32                | 0.28        | 0.89                                 | 7.97         | 8.87           | 117.7                            | 13.21        | 11.88          | 186.3              | 854.4        | 5.32                             |
| 10 m LiTFSI                  | 0.4                   | 4.79                                                             | 0.222                                                                         | 2.010         | 18.37                | 0.36        | 2.38                                 | 21.16        | 23.53          | 90.90                            | 10.21        | 9.18           | 392.0              | 406.0        | 4.14                             |
|                              | 0.8                   |                                                                  | 0.227                                                                         | 2.051         | 18.00                | 0.35        | 2.31                                 | 20.61        | 22.92          | 88.32                            | 9.92         | 8.92           | 371.0              | 429.0        | 4.05                             |
|                              | 1.2                   |                                                                  | 0.264                                                                         | 2.388         | 15.46                | 0.30        | 1.99                                 | 17.75        | 19.74          | 92.33                            | 10.37        | 9.32           | 334.0              | 476.5        | 4.27                             |
| 15 m ChCl                    | 0.4                   | 4.35                                                             | 0.123                                                                         | 1.095         | 30.15                | 0.59        | 2.26                                 | 20.16        | 22.43          | 112.9                            | 12.67        | 11.39          | 448.2              | 355.1        | 5.19                             |
|                              | 0.8                   |                                                                  | 0.125                                                                         | 1.109         | 29.76                | 0.58        | 2.22                                 | 19.81        | 22.03          | 113.1                            | 12.70        | 11.41          | 441.4              | 360.6        | 5.25                             |
|                              | 1.2                   |                                                                  | 0.127                                                                         | 1.134         | 29.10                | 0.57        | 2.14                                 | 19.09        | 21.23          | 111.4                            | 12.50        | 11.24          | 418.6              | 380.2        | 5.14                             |
| 15 m LiTFSI                  | 0.4                   | 1.55                                                             | 0.071                                                                         | 0.637         | 18.77                | 0.36        | 4.90                                 | 43.61        | 48.50          | 105.1                            | 11.81        | 10.62          | 959.9              | 18.77        | 4.76                             |
|                              | 0.8                   |                                                                  | 0.073                                                                         | 0.655         | 18.25                | 0.35        | 4.76                                 | 42.36        | 47.11          | 104.8                            | 11.78        | 10.59          | 929.6              | 18.25        | 4.61                             |
|                              | 1.2                   |                                                                  | 0.079                                                                         | 0.715         | 16.72                | 0.32        | 4.35                                 | 38.76        | 43.11          | 112.5                            | 12.64        | 11.36          | 913.1              | 16.72        | 4.94                             |
| 20 m ChCl                    | 0.4                   | 2.56                                                             | 0.077                                                                         | 0.681         | 28.55                | 0.56        | 3.43                                 | 30.53        | 33.96          | 118.5                            | 13.30        | 11.96          | 654.4              | 243.2        | 5.04                             |
|                              | 0.8                   |                                                                  | 0.076                                                                         | 0.675         | 28.80                | 0.57        | 3.46                                 | 30.84        | 34.30          | 114.9                            | 12.89        | 11.59          | 640.5              | 248.5        | 4.96                             |
|                              | 1.2                   |                                                                  | <b>0.094</b>                                                                  | <b>0.836</b>  | <b>23.26</b>         | <b>0.46</b> | <b>2.79</b>                          | <b>24.86</b> | <b>27.65</b>   | <b>136.5</b>                     | <b>15.32</b> | <b>13.77</b>   | <b>613.3</b>       | <b>259.5</b> | <b>5.89</b>                      |
| 20 m LiTFSI                  | 0.4                   | 0.71                                                             | 0.042                                                                         | 0.377         | 14.52                | 0.28        | 6.37                                 | 56.72        | 63.09          | 111.4                            | 12.52        | 11.26          | 1295.0             | 122.9        | 4.68                             |
|                              | 0.8                   |                                                                  | 0.036                                                                         | 0.325         | 16.81                | 0.33        | 7.32                                 | 65.19        | 72.50          | 106.3                            | 11.94        | 10.74          | 1419.8             | 112.1        | 4.45                             |
|                              | 1.2                   |                                                                  | <b>0.037</b>                                                                  | <b>0.331</b>  | <b>16.53</b>         | <b>0.32</b> | <b>7.16</b>                          | <b>63.76</b> | <b>70.91</b>   | <b>111.9</b>                     | <b>12.57</b> | <b>11.30</b>   | <b>1461.5</b>      | <b>108.9</b> | <b>4.78</b>                      |

**Table S17:** Effect of salt concentration and voltages on the ionic conductivity and resistivity of the bulk water-in-salt electrolyte solutions.

| Salt conc.<br>(mol·kg <sup>-1</sup> ) | Applied<br>voltage (V) | $\sigma$ in-bulk<br>(mS·cm <sup>-1</sup> ) | $R$ in-bulk<br>(Ohm·cm) |
|---------------------------------------|------------------------|--------------------------------------------|-------------------------|
| 1 m ChCl                              | 0.4                    | 54.0                                       | 18.52                   |
|                                       | 0.8                    | 54.1                                       | 18.50                   |
|                                       | 1.2                    | 53.6                                       | 18.67                   |
| 1 m LiTFSI                            | 0.4                    | 29.80                                      | 33.6                    |
|                                       | 0.8                    | 29.62                                      | 33.8                    |
|                                       | 1.2                    | 29.52                                      | 33.9                    |
| 5 m ChCl                              | 0.4                    | 99.5                                       | 10.05                   |
|                                       | 0.8                    | 99.1                                       | 10.09                   |
|                                       | 1.2                    | 99.0                                       | 10.10                   |
| 5 m LiTFSI                            | 0.4                    | 51.98                                      | 19.2                    |
|                                       | 0.8                    | 51.92                                      | 19.3                    |
|                                       | 1.2                    | 51.70                                      | 19.34                   |
| 10 m ChCl                             | 0.4                    | 75.3                                       | 13.29                   |
|                                       | 0.8                    | 75.4                                       | 13.26                   |
|                                       | 1.2                    | 75.1                                       | 13.32                   |
| 10 m LiTFSI                           | 0.4                    | 36.29                                      | 27.6                    |
|                                       | 0.8                    | 36.50                                      | 27.4                    |
|                                       | 1.2                    | 36.40                                      | 27.5                    |
| 15 m ChCl                             | 0.4                    | 62.5                                       | 16.01                   |
|                                       | 0.8                    | 62.8                                       | 15.93                   |
|                                       | 1.2                    | 63.7                                       | 15.70                   |
| 15 m LiTFSI                           | 0.4                    | 17.99                                      | 55.60                   |
|                                       | 0.8                    | 18.00                                      | 55.55                   |
|                                       | 1.2                    | 18.03                                      | 55.5                    |
| 20 m ChCl                             | 0.4                    | 39.07                                      | 25.60                   |
|                                       | 0.8                    | 39.03                                      | 25.62                   |
|                                       | 1.2                    | 39.11                                      | 25.57                   |
| 20 m LiTFSI                           | 0.4                    | 10.69                                      | 93.5                    |
|                                       | 0.8                    | 10.78                                      | 92.8                    |
|                                       | 1.2                    | 10.83                                      | 92.3                    |



The equivalent circuit diagram (**Figure S20**) for capacitor cell using LiTFSI electrolyte has been created using the EC-lab software.<sup>13, 14</sup>

**Elements of equivalent circuit used:**  $R1+C2/(R2+W2)+C3/R3+C4$

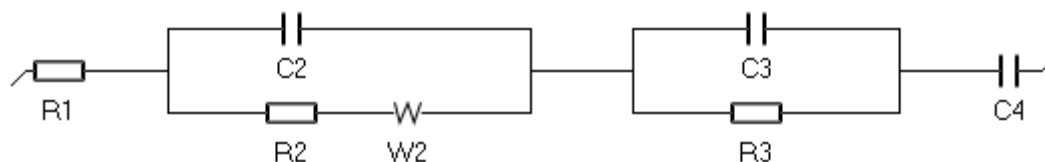

**Figure S20:** Equivalent circuit model for capacitor using aqueous LiTFSI electrolyte

The possible electrochemical meaning corresponding to different fitting elements has been listed. For example, R1 is equivalent series resistance (ESR), C1 is interfacial contact EDL capacitance, R2 the charge transfer resistance, W2 the Warburg co-efficient, C4 the EDL capacitance within Warburg region, R5 the ion diffusion resistance and C5 is the low frequency EDL capacitance after Warburg region. **Figure S21** shows a good matching of experimental and fitted Nyquist plots of capacitor cells assembled with 1, 5, and 20 mol·kg<sup>-1</sup> LiTFSI measured at open circuit potential and 1.2 V using above circuit model, thereby demonstrating the appropriateness of the chosen circuit model. The fitting parameters of the circuit model elements are given in **Table S18**.

**Table S18:** Effect of salt concentration and applied bias potential on different equivalent circuit model elements  $R1+C2/(R2+W2)+C3/R3+C4$ . Fitting was carried out at least three times to determine the corresponding standard deviation values.

| Circuit elements (unit)     | 1 m LiTFSI |           | 5 m LiTFSI |           | 20 m LiTFSI |           |
|-----------------------------|------------|-----------|------------|-----------|-------------|-----------|
|                             | OCP        | 1.2 V     | OCP        | 1.2 V     | OCP         | 1.2 V     |
| R1 (Ohm)                    | 0.86±0.05  | 0.80±0.04 | 0.60±0.03  | 0.50±0.03 | 1.85±0.15   | 1.80±0.14 |
| C2 (F)                      | 6e-5       | 6e-5      | 6e-5       | 6e-5      | 6e-5        | 6e-5      |
| R2 (Ohm)                    | 1.40±0.05  | 1.15±0.04 | 0.70±0.03  | 0.50±0.03 | 1.40±0.12   | 1.10±0.11 |
| W2 (Ohm.s <sup>-1/2</sup> ) | 3.02±0.15  | 2.85±0.12 | 1.10±0.06  | 0.90±0.05 | 3.20±0.16   | 2.95±0.14 |
| C3 (F)                      | 0.05       | 0.05      | 0.06       | 0.06      | 0.045       | 0.035     |
| R3 (Ohm)                    | 0.20±0.05  | 0.15±0.05 | 0.12±0.05  | 0.11±0.05 | 1.00±0.05   | 0.80±0.05 |
| C4 (F)                      | 0.13±0.02  | 0.15±0.02 | 0.14±0.02  | 0.16±0.02 | 0.12±0.03   | 0.10±0.03 |

Expectedly, the influence of salt concentrations and cell voltages on different resistances is in line with different extracted resistances (ESR, CTR, IDR, and EDR) as shown in the main manuscript **Figure 4a**, **Figure 4b**, and *supporting information* **Table S10** and **Table S15**. Likewise, the values of EDL capacitance are in agreement with **Figure 4c**, **Table S11**, **Table S12** and **Table S16**. Besides, the trend of Warburg co-efficient W2 values are also in harmony with the in-pore diffusivity and ion transport resistance as outlined in **Figure 5b** and **Figure 5c**, **Table S12** and **Table S16**.

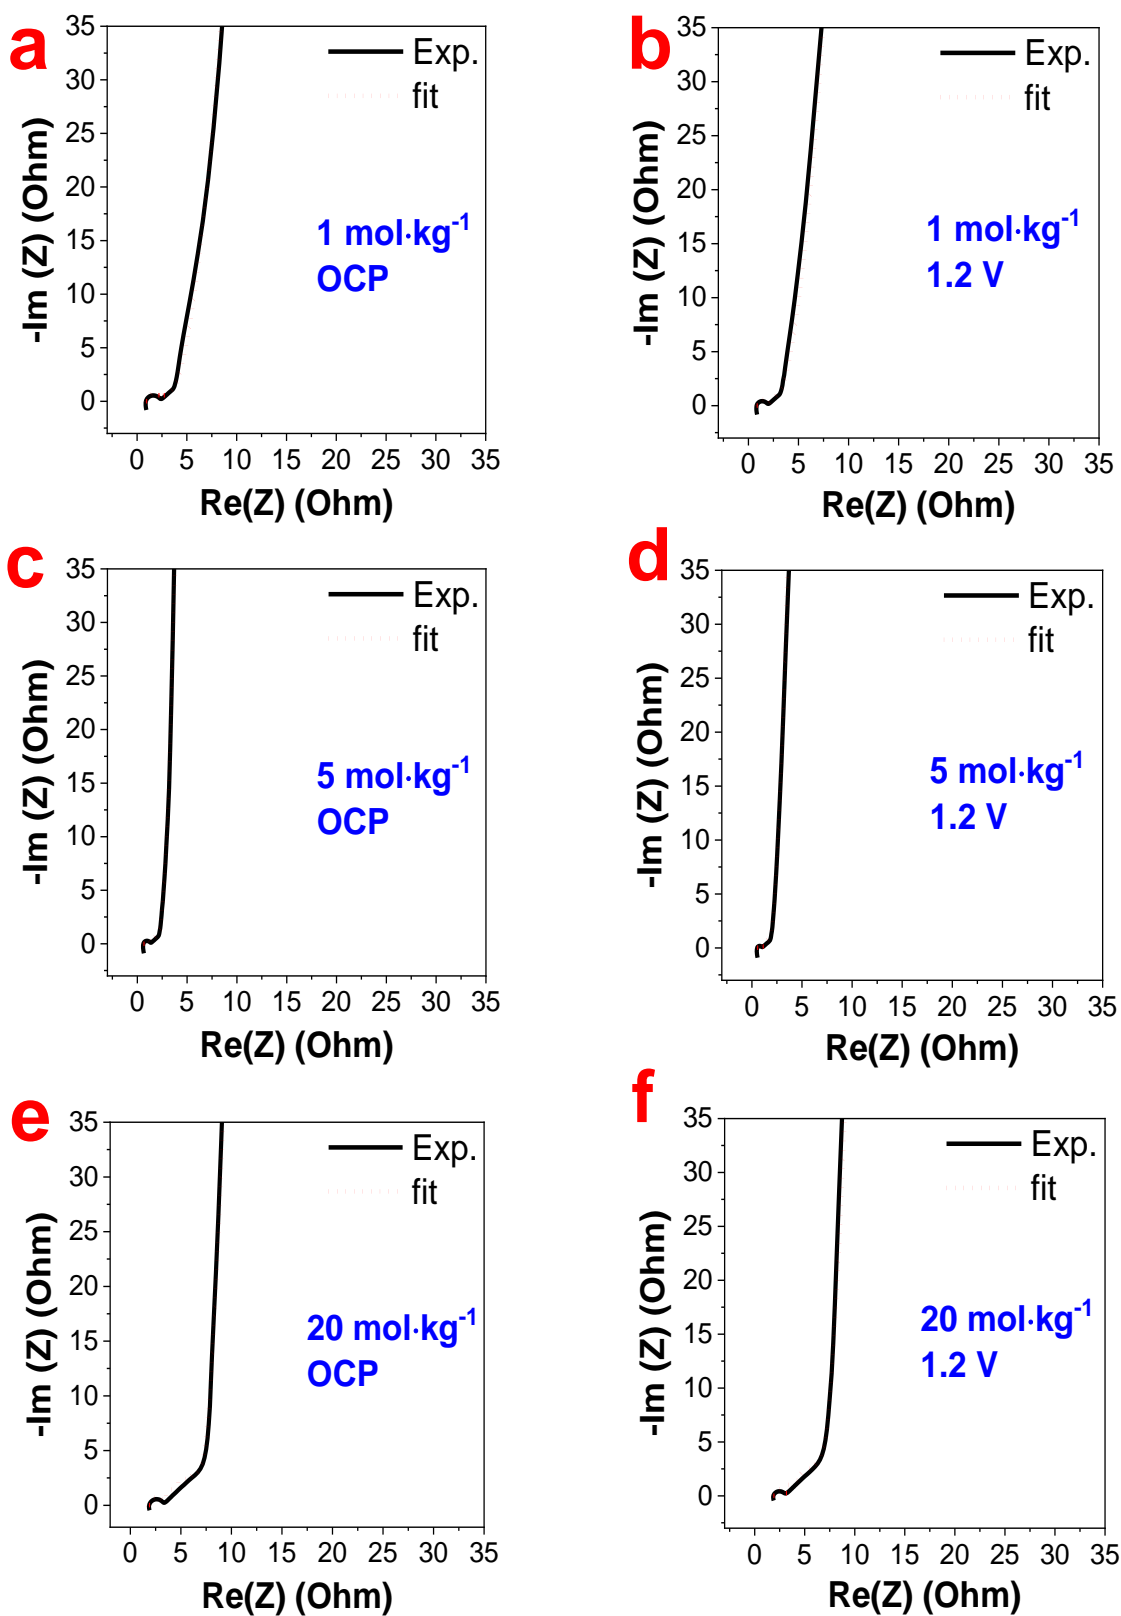

**Figure S21:** The experimental and fitted Nyquist plot of capacitor cell assembled with 1, 5, and 20 mol·kg<sup>-1</sup> LiTFSI measured at open circuit potential (a, c, e) and 1.2 V (b, d, f).

## References

1. K. Tanaka, M. Nomura, *J. Chem. Soc., Faraday Trans.*, 1987, 83, 1779-1782.
2. Q. Abbas, P. Nürnberg, R. Ricco, F. Carraro, B. Gollas, M. Schönhoff., *Adv. Energy Sustainability Res.*, 2021, 2, 2100115.
3. M. Chintapalli, K. Timachova, K.R. Olson, S. J. Mecham, D. Devaux, J.M. Desimone, N.P. Balsara., *Macromolecules.*, 2016, 49, 3508–3515.
4. M. Gouverneur, J. Kopp, L. Van Wüllen, M. Schönhoff, *Phys. Chem. Chem. Phys.*, 2015, 17, 30680–30686.
5. K. Chai, X. Lu, Y. Zhou, H. Liu, G. Wang, Z. Jing, F. Zhu, L. Han, *J Mol Liq.*, 2022, 362, 119742
6. S. Elderderi, L. Wils, C. Leman-Loubière, S. Henry, H.J. Byrne, I. Chourpa, E. Munnier, A.A. Elbashir, L. Boudesocque-Delaye, & Franck Bonnier, *Anal. Bioanal. Chem.*, 413.19 (2021): 4785-4799.
7. S. Krachkovskiy, M. Dontigny, S. Rochon, C. Kim, M.L. Trudeau, K. Zaghrib, *J. Phys. Chem. C.*, 2020, 124, 24624–24630.
8. P. Ahuja, V. Sahu, S.K. Ujjain, R.K. Sharma, G. Singh, *Electrochim Acta.*, 2014, 146, 429–436.
9. K.L. Van Aken, J.K. McDonough, S. Li, G. Feng, S.M. Chathoth, E. Mamontov, P.F. Fulvio, P.T. Cummings, S. Dai, Y. Gogotsi, *J. Phys. Condens. Matter.*, 2014, 26, 284104.
10. R.D. Armstrong, *J Electroanal Chem.*, 1986, 198, 177-180.
11. L. Borchardt, D. Leistenschneider, J. Haase, M. Dvoyashkin, *Adv Energy Mater.*, 2018, 8 1800892.
12. A.C. Forse, J.M. Griffin, C. Merlet, J. Carretero-Gonzalez, A.R.O. Raji, N.M. Trease, C.P. Grey, *Nat Energy.*, 2017, 2, 16216.
13. C. Lei, F. Markoulidis, Z. Ashitaka & C. Lekakou, *Electrochimica acta.*, 2013, 92, 183-187.
14. B. A. Mei, O. Munteshari, J. Lau, B. Dunn, & L. Pilon., *J. Phys. Chem. C.*, 2018, 122, 194–206
